# Supplementary material for: Global epidemiology of occult hepatitis B virus infections in blood donors, a systematic review and meta-analysis
Source: PubMed Central journal article supplement (PMC9394819; doi:10.1371/journal.pone.0272920), 2022-08-22
Supplement: pone.0272920.s002.pdf [file pone.0272920.s002.pdf]

Appendix S2: Search strategy in PubMed

| <b>Search</b>    | <b>Virus</b>                                                                                                                                                                                                                                                                                                                                                                                             |
|------------------|----------------------------------------------------------------------------------------------------------------------------------------------------------------------------------------------------------------------------------------------------------------------------------------------------------------------------------------------------------------------------------------------------------|
| #1<br>Condition  | Occult Hepatitis b OR Occult Viral hepatitis b OR Occult Hepatitis b<br>Virus OR Occult HBV                                                                                                                                                                                                                                                                                                              |
| #2<br>Population | Blood Donor* OR Blood Donors OR Donor, Blood OR Donors, Blood OR Blood<br>Donation OR Blood Donations OR Donation, Blood OR Donations, Blood OR Blood<br>transfusion OR Transfusion OR Transfusion Transmissible Infections OR Volunteer<br>donors OR Blood Transfusion, Intrauterine OR Blood Transfusion, Autologous OR<br>Transfusion Reaction OR Platelet Transfusion OR Blood Component Transfusion |
| #3               | #1 AND #2                                                                                                                                                                                                                                                                                                                                                                                                |
| #4               | Limit #3 in English and French                                                                                                                                                                                                                                                                                                                                                                           |
