# Supplementary material for: Global epidemiology of occult hepatitis B virus infections in blood donors, a systematic review and meta-analysis
Source: PubMed Central journal article supplement (PMC9394819; doi:10.1371/journal.pone.0272920), 2022-08-22
Supplement: pone.0272920.s003.pdf [file pone.0272920.s003.pdf]

Appendix S3. Items for risk of bias assessment

| <b>Hoy et al. tool for cross sectional studies</b>                                                                                                               | <b>Yes (1)/No (0)</b> |
|------------------------------------------------------------------------------------------------------------------------------------------------------------------|-----------------------|
| <b>External validity</b>                                                                                                                                         |                       |
| 1. Was the study's target population a close representation of the national population in relation to occult hepatitis B virus prevalence or case fatality rate? | <b>1</b>              |
| 2. Was the sampling frame a true or close representation of the population?                                                                                      | <b>1</b>              |
| 3. Was some form of random selection used to select the sample, OR was a census undertaken?                                                                      | <b>1</b>              |
| 4. Was the likelihood of non-response bias minimal?                                                                                                              | <b>1</b>              |
| <b>Internal validity</b>                                                                                                                                         |                       |
| 5. Were data collected directly from the subjects (as opposed to a proxy)?                                                                                       | <b>1</b>              |
| 6. Was an acceptable case definition used in the study?                                                                                                          | <b>1</b>              |
| 7. Was the study viral detection assay shown to have validity and reliability?                                                                                   | <b>1</b>              |
| 8. Was the same mode type of sample collected for all subjects?                                                                                                  | <b>1</b>              |
| 9. Was the length of the length of the study period > 1 year?                                                                                                    | <b>1</b>              |
| 10. Were the numerator(s) and denominator(s) for the prevalence or case fatality rate of occult hepatitis B virus appropriate?                                   | <b>1</b>              |
| Total score                                                                                                                                                      | <b>10</b>             |
| <b>Interpretation of the risk of bias tool</b>                                                                                                                   |                       |
| <ul style="list-style-type: none"> <li>• 7-10: Low risk of bias</li> <li>• 4-6: Moderate risk of bias</li> <li>• 0-3: High risk of bias</li> </ul>               |                       |
