# Supplementary material for: Global epidemiology of occult hepatitis B virus infections in blood donors, a systematic review and meta-analysis
Source: PubMed Central journal article supplement (PMC9394819; doi:10.1371/journal.pone.0272920), 2022-08-22
Supplement: pone.0272920.s004.pdf [file pone.0272920.s004.pdf]

Appendix S4. Main reasons of exclusion of eligible studies

| N° | Author, Year               | Title                                                                                                                                                                        | Reason of exclusion                                             |
|----|----------------------------|------------------------------------------------------------------------------------------------------------------------------------------------------------------------------|-----------------------------------------------------------------|
| 1  | Abd El Kader Mahmoud, 2013 | Detection of occult hepatitis B virus infection among blood donors in Sudan.                                                                                                 | No data on OBI prevalence or case fatality rate in blood donors |
| 2  | Aftab Ahmed, 2012          | Transfusion transmitted infections [TTIS] among blood donors of Sukkur.                                                                                                      | No data on OBI prevalence or case fatality rate in blood donors |
| 3  | Akintule, 2018             | Occult HBV Infection in Nigeria.                                                                                                                                             | No data on the number of HBsAg negative tested                  |
| 4  | Allain, 200                | Characterization of Occult Hepatitis B Virus Strains in South African Blood Donors.                                                                                          | Selection of study participants with already OBI result known   |
| 5  | Allain, 2013               | Infectivity of blood products from donors with occult hepatitis B virus infection.                                                                                           | Selection of study participants with already OBI result known   |
| 6  | Alzahrani, 2019            | Prevalence of Hepatitis B Virus (HBV) Among Blood Donors in Eastern Saudi Arabia: Results From a Five-Year Retrospective Study of HBV Seromarkers.                           | No data on the number of HBsAg negative tested                  |
| 7  | Bartelik, 2011             | Frequency of hepatitis B and hepatitis C markers and HIV markers detection in blood donors from the Swietokrzyskie region.                                                   | No data on OBI prevalence or case fatality rate in blood donors |
| 8  | Beltran, 2011              | Absence of occult hepatitis B in Colombian blood donors.                                                                                                                     | No data on OBI prevalence or case fatality rate in blood donors |
| 9  | Ben-Chun, 2019             | Application of TMA Technology in Donors' HBV-DNA Detection.                                                                                                                  | No data on OBI prevalence or case fatality rate in blood donors |
| 10 | Brojer, 2011               | Decade of viral nucleic acid testing (NAT) in Poland (2000- 2010); Methods and yields.                                                                                       | Full text or abstract not found                                 |
| 11 | Brojer, 2006               | Characterization of HBV DNA+/HBsAg- blood donors in Poland identified by triplex NAT.                                                                                        | No data on the number of HBsAg negative tested                  |
| 12 | Candoti, 2008              | Characterization of occult hepatitis B virus from blood donors carrying genotype A2 or genotype D strains.                                                                   | Selection of study participants with already OBI result known   |
| 13 | Candotti, 2012             | Occult hepatitis B infection in blood donors from South East Asia: molecular characterisation and potential mechanisms of occurrence.                                        | No data on OBI prevalence or case fatality rate in blood donors |
| 14 | Carimo, 2018               | First report of occult hepatitis B infection among ART naive HIV seropositive individuals in Maputo, Mozambique.                                                             | No data on OBI prevalence or case fatality rate in blood donors |
| 15 | Chamni, 2014               | Genetic characterization and genotyping of hepatitis B virus (HBV) isolates from donors with an occult HBV infection.                                                        | Selection of study participants with already OBI result known   |
| 16 | Compston, 2009             | Prevalence of Persistent and Latent Viruses in Untreated Patients Infected With HIV-1 From Ghana, West Africa.                                                               | No data on the number of HBsAg negative tested                  |
| 17 | Darmawan, 2015             | Seroepidemiology and Occult Hepatitis B Virus Infection in Young Adults in Banjarmasin, Indonesia.                                                                           | No data on OBI prevalence or case fatality rate in blood donors |
| 18 | Das, 2017                  | Enhancing blood safety through pioneering nat technology in Eastern India.                                                                                                   | Duplicates                                                      |
| 19 | Datta, 2019                | Nucleic acid amplification test: Bridging the gap in blood safety & re-evaluation of blood screening for cryptic transfusion-transmitted infection among Indian donors.      | No data on the number of HBsAg negative tested                  |
| 20 | Deng, 2020                 | Alternative hepatitis B virus DNA confirmatory algorithm identified occult hepatitis B virus infection in Chinese blood donors with non-discriminatory nucleic acid testing. | No data on the number of HBsAg negative tested                  |

|    |                       |                                                                                                                                                      |                                                                 |
|----|-----------------------|------------------------------------------------------------------------------------------------------------------------------------------------------|-----------------------------------------------------------------|
| 21 | Diarra, 2018          | Occult Hepatitis B Virus Infection and Associated Genotypes among HBsAg-negative Subjects in Burkina Faso.                                           | No data on OBI prevalence or case fatality rate in blood donors |
| 22 | Dong, 2014            | A pilot study on screening blood donors with individual-donation nucleic acid testing in China.                                                      | Prevalence determined with repeat donors                        |
| 23 | Dumaidi, 2014         | Prevalence of Occult HBV Among Hemodialysis Patients in Two Districts in the Northern Part of the West Bank, Palestine.                              | No data on OBI prevalence or case fatality rate in blood donors |
| 24 | Durro, 2011           | Trends in prevalence of hepatitis B virus infection among Albanian blood donors, 1999-2009.                                                          | No data on OBI prevalence or case fatality rate in blood donors |
| 25 | El-Zaatari, 2007      | Hepatitis B virus DNA in serum of 'anti-HBc only'-positive healthy Lebanese blood donors: significance and possible implications.                    | No data on OBI prevalence or case fatality rate in blood donors |
| 26 | Pandey, 2016          | Confirmation and follow up of initial "NAT yields": Prospective study from a tertiary healthcare center in India.                                    | Sample size < or = 10 participants                              |
| 27 | Fang, 2014            | Hepatitis B virus genotypes, phylogeny and occult infection in a region with a high incidence of hepatocellular carcinoma in China.                  | Sample size < or = 10 participants                              |
| 28 | Geraldine, 2006       | Evidence of occult hepatitis B virus infection among omani blood donors: a preliminary study.                                                        | Sample size < or = 10 participants                              |
| 29 | Gessoni, 2014         | Significance of anti-HBc only in blood donors: a serological and virological study after hepatitis B vaccination.                                    | No data on OBI prevalence or case fatality rate in blood donors |
| 30 | Gonzales, 2010        | Efficacy of hepatitis B virus (HBV) DNA screening and characterization of acute and occult HBV infections among blood donors from Madrid, Spain.     | Prevalence determined with repeat donors                        |
| 31 | Gonzales Fraile, 2010 | Look-back studies in OBI donors. A comparison of two commercial NAT methods.                                                                         | Prevalence determined with repeat donors                        |
| 32 | Gonzalez, 2020        | Overt and occult hepatitis B among immigrants and native blood donors in Madrid, Spain.                                                              | Prevalence determined with repeat donors                        |
| 33 | Gou, 2015             | Evaluation of an individual-donation nucleic acid amplification testing algorithm for detecting hepatitis B virus infection in Chinese blood donors. | Selection of study participants with already OBI result known   |
| 34 | Grabarczyk, 2015      | Blood donors screening for blood born viruses in Poland.                                                                                             | Review                                                          |
| 35 | Harvala, 2021         | Hepatitis B infections among blood donors in England between 2009 and 2018: Is an occult hepatitis B infection a risk for blood safety?              | Prevalence determined with repeat donors                        |
| 36 | Hern, 2020            | Occult hepatitis B infections and anti-HBc prevalence at a resource-limited blood bank in Mexico.                                                    | Prevalence determined with repeat donors                        |
| 37 | Huang, 2010           | Occult HBV infection in patients with anti-HBc positive alone.                                                                                       | Article not in English or in French                             |
| 38 | Hwang, 2003           | Safety of anti-hepatitis B core antibody-positive donors for living-donor liver transplantation.                                                     | No data on OBI prevalence or case fatality rate in blood donors |
| 39 | Iram, 2009            | Seroprevalence of transfusion transmissible infections [TTIS] in blood donors.                                                                       | No data on OBI prevalence or case fatality rate in blood donors |
| 40 | Kaminski, 2006        | Evidence of occult hepatitis B virus infection among Omani blood donors: a preliminary study.                                                        | No data on the number of HBsAg negative tested                  |
| 41 | Karimi, 2016          | Prevalence of antibody to Hepatitis B core antigen and Hepatitis B virus DNA in HBsAg negative healthy blood donors.                                 | Prevalence determined with repeat donors                        |
| 42 | Katchaki, 1978        | Serological evidence of presence of HBsAg undetectable by conventional radioimmunoassay in anti-HBc positive blood donors.                           | Sample size < or = 10 participants                              |
| 43 | Katsoulidou, 2009     | Molecular Characterization of Occult Hepatitis B Cases in Greek Blood Donors.                                                                        | No data on the number of HBsAg negative tested                  |
| 44 | Khin, 2017            | Prevalence of hepatitis b core antibody only positive among hepatitis b surface antigen negative blood donors in Mandalay General Hospital, Myanmar. | No data on OBI prevalence or case fatality rate in blood donors |

|    |                          |                                                                                                                                                                                                           |                                                                 |
|----|--------------------------|-----------------------------------------------------------------------------------------------------------------------------------------------------------------------------------------------------------|-----------------------------------------------------------------|
| 45 | Khorami, 2013            | Prevalence of HBc-Ab among HBs-Ag negative healthy blood donors in south of Iran.                                                                                                                         | No data on OBI prevalence or case fatality rate in blood donors |
| 46 | Kiely, 2014              | Hepatitis B virus nucleic acid amplification testing of Australian blood donors highlights the complexity of confirming occult hepatitis B virus infection.                                               | Prevalence determined with repeat donors                        |
| 47 | Kopacz, 2009             | The results of look back and trace back procedures for HBV DNA positive/hbsag negative donors identified in Poland.                                                                                       | No data on the number of HBsAg negative tested                  |
| 48 | Kupski, 2008             | Serologic and molecular profile of anti-HBc-positive blood bank donors in an area of low endemicity for HBV.                                                                                              | No data on OBI prevalence or case fatality rate in blood donors |
| 49 | Larralde, 2013           | Hepatitis B escape mutants in Scottish blood donors.                                                                                                                                                      | No data on the number of HBsAg negative tested                  |
| 50 | Viet, 2012               | Prevalence of hepatitis B & hepatitis C virus infections in potential blood donors in rural Vietnam.                                                                                                      | No data on OBI prevalence or case fatality rate in blood donors |
| 51 | Lelie, 2016              | Detection of different categories of hepatitis B virus (HBV) infection in a multi-regional study comparing the clinical sensitivity of hepatitis B surface antigen and HBV-DNA testing.                   | No data on the number of HBsAg negative tested                  |
| 52 | Li, 2008                 | A pilot study for screening blood donors in Taiwan by nucleic acid amplification technology: detecting occult hepatitis B virus infections and closing the serologic window period for hepatitis C virus. | No data on OBI prevalence or case fatality rate in blood donors |
| 53 | Liang, 2010              | [A cross-sectional survey of occult hepatitis B virus infection in HIV-infected patients in acquired immune deficiency syndrome area].                                                                    | Article not in English or in French                             |
| 54 | Lieshout-Krikke, 2016    | Rare transmission of hepatitis B virus by Dutch donors with occult infection.                                                                                                                             | Prevalence determined with repeat donors                        |
| 55 | Lieshout-Krikke, 2014    | Surface antigen-negative hepatitis B virus infection in Dutch blood donors.                                                                                                                               | No data on the number of HBsAg negative tested                  |
| 56 | Lin, 2014                | Detection and identification of occult HBV in blood donors in Taiwan using a commercial, multiplex, multi-dye nucleic acid amplification technology screening test.                                       | No data on OBI prevalence or case fatality rate in blood donors |
| 57 | Lin, 2016                | Serological Patterns and Molecular Characterization of Occult Hepatitis B Virus Infection among Blood Donors.                                                                                             | Prevalence determined with repeat donors                        |
| 58 | Lin, 2016                | Prevalence of Occult Hepatitis C Virus Infection among Blood Donors in Jiangsu, China.                                                                                                                    | No data on OBI prevalence or case fatality rate in blood donors |
| 59 | Liu, 2003                | Clinical aspects and outcomes of volunteer blood donors testing positive for hepatitis-C virus infection in Taiwan: a prospective study.                                                                  | No data on OBI prevalence or case fatality rate in blood donors |
| 60 | Louisirirochanakul, 2011 | Occult hepatitis B virus infection in Thai blood donors.                                                                                                                                                  | Selection of study participants with already OBI result known   |
| 61 | Makroo, 2015             | Evaluation of the Procleix Ultrio Plus ID NAT assay for detection of HIV 1, HBV and HCV in blood donors.                                                                                                  | No data on OBI prevalence or case fatality rate in blood donors |
| 62 | Makroo, 2012             | Hepatitis B core antibody testing in Indian blood donors: A double-edged sword!                                                                                                                           | No data on OBI prevalence or case fatality rate in blood donors |
| 63 | Manzini, 2009            | Evidence of acute primary occult hepatitis B virus infection in an Italian repeat blood donor.                                                                                                            | Case report                                                     |
| 64 | Martin, 2012             | Correlation of improved hepatitis B surface antigen detection limits with hepatitis B virus DNA nucleic acid test yield in blood donations.                                                               | No data on OBI prevalence or case fatality rate in blood donors |
| 65 | Meilan, 2012             | Comparison the effect of individual donation NAT and minipool of 16 donations NAT.                                                                                                                        | No data on OBI prevalence or case fatality rate in blood donors |

|    |                   |                                                                                                                                                                             |                                                                 |
|----|-------------------|-----------------------------------------------------------------------------------------------------------------------------------------------------------------------------|-----------------------------------------------------------------|
| 66 | Men, 2017         | [Blood Test Patterns for Blood Donors after Nucleic Acid Detection in the Blood Center].                                                                                    | No data on OBI prevalence or case fatality rate in blood donors |
| 67 | Mosley, 1995      | Donor screening for antibody to hepatitis B core antigen and hepatitis B virus infection in transfusion recipients.                                                         | No data on OBI prevalence or case fatality rate in blood donors |
| 68 | Motayo, 2015      | Seroprevalence of transfusion transmissible infections (TTI), in first time blood donors in Abeokuta, Nigeria.                                                              | No data on OBI prevalence or case fatality rate in blood donors |
| 69 | Nishiya, 2021     | Occult and active hepatitis B virus detection in donated blood in Sao Paulo, Brazil.                                                                                        | Prevalence determined with repeat donors                        |
| 70 | Nna, 2014         | Occult hepatitis B viral infection among blood donors in South-Eastern Nigeria.                                                                                             | Prevalence determined with repeat donors                        |
| 71 | Ol, 2009          | PREVALENCE OF HEPATITIS B AND HEPATITIS C VIRUS INFECTIONS IN POTENTIAL BLOOD DONORS IN RURAL CAMBODIA.                                                                     | No data on OBI prevalence or case fatality rate in blood donors |
| 72 | Panhotra, 2005    | Occult hepatitis B virus infection among anti-HBc positive blood donors: Necessitates substitution of screening by HBV NAT.                                                 | Case report                                                     |
| 73 | Phan, 2021        | Low Genetic Diversity of Hepatitis B Virus Surface Gene amongst Australian Blood Donors.                                                                                    | No data on OBI prevalence or case fatality rate in blood donors |
| 74 | Phikulsod, 2009   | One-year experience of nucleic acid technology testing for human immunodeficiency virus Type 1, hepatitis C virus, and hepatitis B virus in Thai blood donations.           | No data on the number of HBsAg negative tested                  |
| 75 | Pisaturo, 2020    | Prevalence of occult HBV infection in Western countries.                                                                                                                    | Review                                                          |
| 76 | Punde, 2011       | Ascertaining the prevalence of occult hepatitis B virus infection in voluntary blood donors: a study from Central India.                                                    | Comment on an article                                           |
| 77 | Ramachandra, 2019 | Recent and occult hepatitis B virus infections among blood donors in the United States.                                                                                     | Prevalence determined with repeat donors                        |
| 78 | Reesink, 2008     | Occult hepatitis B infection in blood donors.                                                                                                                               | No data on OBI prevalence or case fatality rate in blood donors |
| 79 | Ren, 2011         | Hepatitis B virus nucleic acid testing in Chinese blood donors with normal and elevated alanine aminotransferase.                                                           | No data on the number of HBsAg negative tested                  |
| 80 | Romanò, 2013      | Hepatitis B virus infection among first-time blood donors in Italy: prevalence and correlates between serological patterns and occult infection.                            | No data on OBI prevalence or case fatality rate in blood donors |
| 81 | Samardžija, 2020  | The impact of positive anti-hbc marker on permanent deferral of voluntary blood donors in eastern croatia and estimation of occult hepatitis b virus infection rate.        | No data on OBI prevalence or case fatality rate in blood donors |
| 82 | Satake, 2015      | Eradication of transfusion-transmitted HBV infection by NAT and Anti-HBc screening in Japan.                                                                                | No data on OBI prevalence or case fatality rate in blood donors |
| 83 | Satake, 2007      | Infectivity of blood components with low hepatitis B virus DNA levels identified in a lookback program.                                                                     | Prevalence determined with repeat donors                        |
| 84 | Scheiblauer, 2020 | Detection of hepatitis B virus infection in German blood donors 2008-2015.                                                                                                  | Prevalence determined with repeat donors                        |
| 85 | Seed, 2015        | Infectivity of blood components from donors with occult hepatitis B infection - results from an Australian lookback programme.                                              | No data on OBI prevalence or case fatality rate in blood donors |
| 86 | Seo, 2015         | Occult hepatitis B virus infection and blood transfusion.                                                                                                                   | Review                                                          |
| 87 | Spreafico, 2015   | Poor efficacy of nucleic acid testing in identifying occult HBV infection and consequences for safety of blood supply in Italy.                                             | No data on the number of HBsAg negative tested                  |
| 88 | Stanic, 2017      | Three-Year Experience in NAT Screening of Blood Donors for Transfusion Transmitted Viruses in Croatia.                                                                      | No data on the number of HBsAg negative tested                  |
| 89 | Stolz, 2010       | Efficacy of individual nucleic acid amplification testing in reducing the risk of transfusion-transmitted hepatitis B virus infection in Switzerland, a low-endemic region. | No data on the number of HBsAg negative tested                  |

|     |                   |                                                                                                                                                                                                   |                                                                 |
|-----|-------------------|---------------------------------------------------------------------------------------------------------------------------------------------------------------------------------------------------|-----------------------------------------------------------------|
| 90  | Stolz, 2014       | Hepatitis B virus DNA viral load determination in hepatitis B surface antigen-negative Swiss blood donors.                                                                                        | Prevalence determined with repeat donors                        |
| 91  | Su, 2011          | The clinical significance of occult hepatitis B transfusion in Taiwan - a look-back study.                                                                                                        | No data on the number of HBsAg negative tested                  |
| 92  | Tang, 2018        | Incidence of hepatitis B virus infection in young Chinese blood donors born after mandatory implementation of neonatal hepatitis B vaccination nationwide.                                        | No data on the number of HBsAg negative tested                  |
| 93  | Tsoi, 2013        | Enhanced detection of hepatitis B virus in Hong Kong blood donors after introduction of a more sensitive transcription-mediated amplification assay.                                              | No data on the number of HBsAg negative tested                  |
| 94  | Van De Laar, 2021 | Blood donor screening in the Netherlands: Universal anti-HBc screening in combination with HBV nucleic acid amplification testing may allow discontinuation of hepatitis B virus antigen testing. | No data on OBI prevalence or case fatality rate in blood donors |
| 95  | Vermeulen, 2019   | Reassessment of hepatitis B virus window periods for two transcription-mediated amplification assays using screening data of South African blood donors.                                          | No data on the number of HBsAg negative tested                  |
| 96  | Wang, 2020        | Novel hepatitis B virus surface antigen mutations associated with occult genotype B hepatitis B virus infection affect HBsAg detection.                                                           | Selection of study participants with already OBI result known   |
| 97  | Wang, 2020        | Occurrence of occult hepatitis B virus infection associated with envelope protein mutations according to anti-HBs carriage in blood donors.                                                       | Prevalence determined with repeat donors                        |
| 98  | Wang, 2016        | Prevalence of hepatitis B surface antigen (HBsAg) in a blood donor population born prior to and after implementation of universal HBV vaccination in Shenzhen, China.                             | Prevalence determined with repeat donors                        |
| 99  | Xiao, 2013        | Comparative evaluation of a triplex nucleic acid test for detection of HBV DNA, HCV RNA, and HIV-1 RNA, with the Procleix Tigris System.                                                          | No data on OBI prevalence or case fatality rate in blood donors |
| 100 | Xiuwen, 2017      | Serological and virological epidemiology characterization of occult hepatitis B virus infection in Jiaxing volunteer blood donors.                                                                | Article not in English or in French                             |
| 101 | Yang, 2010        | The efficacy of individual-donation and minipool testing to detect low-level hepatitis B virus DNA in Taiwan.                                                                                     | No data on OBI prevalence or case fatality rate in blood donors |
| 102 | Ye, 2013          | Six-year pilot study on nucleic acid testing for blood donations in China.                                                                                                                        | No baseline data for longitudinal study                         |
| 103 | Yoshikawa, 2007   | Lengths of hepatitis B viremia and antigenemia in blood donors: preliminary evidence of occult (hepatitis B surface antigen-negative) infection in the acute stage.                               | No data on OBI prevalence or case fatality rate in blood donors |
| 104 | Yuen, 2011        | Transmissibility of hepatitis B virus (HBV) infection through blood transfusion from blood donors with occult HBV infection.                                                                      | No data on the number of HBsAg negative tested                  |
| 105 | Zhang, 2019       | Occult HBV infection in Chinese blood donors: role of N-glycosylation mutations and amino acid substitutions in S protein transmembrane domains.                                                  | No data on OBI prevalence or case fatality rate in blood donors |
| 106 | Zhang, 2018       | [Screening of HBV and Positive Population Distribution Characteristics of Voluntary Blood Donors in Qingyang].                                                                                    | Article not in English or in French                             |
| 107 | Zheng, 2019       | Blood test strategy of blood donors, ALT and HBsAg HCV-Ab correlation study.                                                                                                                      | Full text or abstract not found                                 |
| 108 | Zheng, 2015       | High prevalence of anti-hepatitis B core antigen in hepatitis B virus-vaccinated Chinese blood donors suggests insufficient protection but little threat to the blood supply.                     | No data on OBI prevalence or case fatality rate in blood donors |
| 109 | Zhou, 2008        | [Evaluation of multiplex nucleic acid testing assays for screening of hepatitis B virus DNA in blood donation process].                                                                           | Article not in English or in French                             |
