# Supplementary material for: Global epidemiology of occult hepatitis B virus infections in blood donors, a systematic review and meta-analysis
Source: PubMed Central journal article supplement (PMC9394819; doi:10.1371/journal.pone.0272920), 2022-08-22
Supplement: pone.0272920.s006.pdf [file pone.0272920.s006.pdf]

Appendix S6. Characteristics of included studies

| <b>Characteristics</b>                            | <b>Overall (87)</b> | <b>HBsAg negative and anti-HBc positive (54)</b> | <b>HBsAg negative and anti-HBc negative (6)</b> | <b>HBsAg negative (27)</b> |
|---------------------------------------------------|---------------------|--------------------------------------------------|-------------------------------------------------|----------------------------|
| <b>Year of publication; range</b>                 | 2001-2021           | 2001-2021                                        | 2004-2018                                       | 2003-2020                  |
| <b>Period of inclusion of participants; range</b> | 1991-2019           | 1991-2019                                        | 1995-2016                                       | 2003-2018                  |
| <b>Study Design</b>                               |                     |                                                  |                                                 |                            |
| Case control                                      | 1 (1.2)             |                                                  |                                                 | 1 (3.7)                    |
| Cross-sectional                                   | 86 (98.9)           | 54 (100)                                         | 6 (100)                                         | 26 (96.3)                  |
| <b>Sampling</b>                                   |                     |                                                  |                                                 |                            |
| Non probabilistic                                 | 71 (81.6)           | 45 (83.3)                                        | 4 (66.7)                                        | 22 (81.5)                  |
| Probabilistic                                     | 16 (18.4)           | 9 (16.7)                                         | 2 (33.3)                                        | 5 (18.5)                   |
| <b>Setting</b>                                    |                     |                                                  |                                                 |                            |
| Community-based                                   | 1 (1.2)             | 1 (1.9)                                          |                                                 |                            |
| Hospital-based                                    | 86 (98.9)           | 53 (98.2)                                        | 6 (100)                                         | 27 (100)                   |
| <b>Number of sites</b>                            |                     |                                                  |                                                 |                            |
| Monocenter                                        | 67 (77.0)           | 43 (79.6)                                        | 5 (83.3)                                        | 19 (70.4)                  |
| Multicenter                                       | 20 (23.0)           | 11 (20.4)                                        | 1 (16.7)                                        | 8 (29.6)                   |
| <b>Timing of samples collection</b>               |                     |                                                  |                                                 |                            |
| Prospectively                                     | 67 (77.0)           | 41 (75.9)                                        | 6 (100)                                         | 20 (74.1)                  |
| Retrospectively                                   | 20 (23.0)           | 13 (24.1)                                        |                                                 | 7 (25.9)                   |
| <b>Countries</b>                                  |                     |                                                  |                                                 |                            |
| China                                             | 15 (17.2)           | 4 (7.4)                                          |                                                 | 11 (40.7)                  |
| India                                             | 13 (14.9)           | 7 (13.0)                                         | 1 (16.7)                                        | 5 (18.5)                   |
| Iran                                              | 10 (11.5)           | 8 (14.8)                                         | 1 (16.7)                                        | 1 (3.7)                    |
| Egypt                                             | 5 (5.8)             | 3 (5.6)                                          | 1 (16.7)                                        | 1 (3.7)                    |
| Mexico                                            | 4 (4.6)             | 3 (5.6)                                          |                                                 | 1 (3.7)                    |
| Nigeria                                           | 4 (4.6)             | 1 (1.9)                                          |                                                 | 3 (11.1)                   |
| Brazil                                            | 3 (3.5)             | 2 (3.7)                                          | 1 (16.7)                                        |                            |
| Malaysia                                          | 3 (3.5)             | 2 (3.7)                                          |                                                 | 1 (3.7)                    |
| Pakistan                                          | 3 (3.5)             | 3 (5.6)                                          |                                                 |                            |

| <b>Characteristics</b>   | <b>Overall (87)</b> | <b>HBsAg negative and anti-HBc positive (54)</b> | <b>HBsAg negative and anti-HBc negative (6)</b> | <b>HBsAg negative (27)</b> |
|--------------------------|---------------------|--------------------------------------------------|-------------------------------------------------|----------------------------|
| United States of America | 3 (3.5)             | 3 (5.6)                                          |                                                 |                            |
| Argentina                | 2 (2.3)             | 1 (1.9)                                          | 1 (16.7)                                        |                            |
| Indonesia                | 2 (2.3)             | 1 (1.9)                                          |                                                 | 1 (3.7)                    |
| Japan                    | 2 (2.3)             | 2 (3.7)                                          |                                                 |                            |
| Syria                    | 2 (2.3)             | 2 (3.7)                                          |                                                 |                            |
| Venezuela                | 2 (2.3)             | 1 (1.9)                                          | 1 (16.7)                                        |                            |
| Bangladesh               | 1 (1.2)             | 1 (1.9)                                          |                                                 |                            |
| Cameroon                 | 1 (1.2)             | 1 (1.9)                                          |                                                 |                            |
| Canada                   | 1 (1.2)             | 1 (1.9)                                          |                                                 |                            |
| Colombia                 | 1 (1.2)             | 1 (1.9)                                          |                                                 |                            |
| Italy                    | 1 (1.2)             | 1 (1.9)                                          |                                                 |                            |
| Kenya                    | 1 (1.2)             |                                                  |                                                 | 1 (3.7)                    |
| Laos                     | 1 (1.2)             | 1 (1.9)                                          |                                                 |                            |
| Mongolia                 | 1 (1.2)             |                                                  |                                                 | 1 (3.7)                    |
| Mozambique               | 1 (1.2)             |                                                  |                                                 | 1 (3.7)                    |
| Saudi Arabia             | 1 (1.2)             | 1 (1.9)                                          |                                                 |                            |
| South Korea              | 1 (1.2)             | 1 (1.9)                                          |                                                 |                            |
| Spain                    | 1 (1.2)             | 1 (1.9)                                          |                                                 |                            |
| Sudan                    | 1 (1.2)             | 1 (1.9)                                          |                                                 |                            |
| Turkey                   | 1 (1.2)             | 1 (1.9)                                          |                                                 |                            |
| <b>WHO Region</b>        |                     |                                                  |                                                 |                            |
| Western Pacific          | 23 (26.4)           | 10 (18.5)                                        |                                                 | 13 (48.2)                  |
| Eastern Mediterranean    | 22 (25.3)           | 18 (33.3)                                        | 2 (33.3)                                        | 2 (7.4)                    |
| America                  | 16 (18.4)           | 12 (22.2)                                        | 3 (50.0)                                        | 1 (3.7)                    |
| South-East Asia          | 16 (18.4)           | 9 (16.7)                                         | 1 (16.7)                                        | 6 (22.2)                   |
| Africa                   | 7 (8.1)             | 2 (3.7)                                          |                                                 | 5 (18.5)                   |
| Europe                   | 3 (3.5)             | 3 (5.6)                                          |                                                 |                            |
| <b>UNSD Region</b>       |                     |                                                  |                                                 |                            |
| Southern Asia            | 27 (31.0)           | 19 (35.2)                                        | 2 (33.3)                                        | 6 (22.2)                   |

| <b>Characteristics</b>                        | <b>Overall (87)</b> | <b>HBsAg negative and anti-HBc positive (54)</b> | <b>HBsAg negative and anti-HBc negative (6)</b> | <b>HBsAg negative (27)</b> |
|-----------------------------------------------|---------------------|--------------------------------------------------|-------------------------------------------------|----------------------------|
| Eastern Asia                                  | 19 (21.8)           | 7 (13.0)                                         |                                                 | 12 (44.4)                  |
| South America                                 | 8 (9.2)             | 5 (9.3)                                          | 3 (50.0)                                        |                            |
| Northern Africa                               | 6 (6.9)             | 4 (7.4)                                          | 1 (16.7)                                        | 1 (3.7)                    |
| Southeastern Asia                             | 6 (6.9)             | 4 (7.4)                                          |                                                 | 2 (7.4)                    |
| Central America                               | 4 (4.6)             | 3 (5.6)                                          |                                                 | 1 (3.7)                    |
| Northern America                              | 4 (4.6)             | 4 (7.4)                                          |                                                 |                            |
| West Africa                                   | 4 (4.6)             | 1 (1.9)                                          |                                                 | 3 (11.1)                   |
| Western Asia                                  | 4 (4.6)             | 4 (7.4)                                          |                                                 |                            |
| Eastern Africa                                | 2 (2.3)             |                                                  |                                                 | 2 (7.4)                    |
| Southern Europe                               | 2 (2.3)             | 2 (3.7)                                          |                                                 |                            |
| Central Africa                                | 1 (1.2)             | 1 (1.9)                                          |                                                 |                            |
| <b>Country income level</b>                   |                     |                                                  |                                                 |                            |
| Upper-middle-income economies                 | 43 (49.4)           | 24 (44.4)                                        | 4 (66.7)                                        | 15 (55.6)                  |
| Lower-middle income economies                 | 30 (34.5)           | 17 (31.5)                                        | 2 (33.3)                                        | 11 (40.7)                  |
| High-income economies                         | 10 (11.5)           | 10 (18.5)                                        |                                                 |                            |
| Low-income economies                          | 4 (4.6)             | 3 (5.6)                                          |                                                 | 1 (3.7)                    |
| <b>Age range</b>                              |                     |                                                  |                                                 |                            |
| Adults                                        | 22 (25.3)           | 14 (25.9)                                        | 1 (16.7)                                        | 7 (25.9)                   |
| All ages                                      | 1 (1.2)             | 1 (1.9)                                          |                                                 |                            |
| Unclear/Not reported                          | 64 (73.6)           | 39 (72.2)                                        | 5 (83.3)                                        | 20 (74.1)                  |
| <b>OBI diagnostic method</b>                  |                     |                                                  |                                                 |                            |
| Real-time PCR                                 | 59 (67.8)           | 41 (75.9)                                        | 4 (66.7)                                        | 14 (51.9)                  |
| Classical PCR                                 | 27 (31.0)           | 12 (22.2)                                        | 2 (33.3)                                        | 13 (48.2)                  |
| Loop mediated isothermal amplification (LAMP) | 1 (1.2)             | 1 (1.9)                                          |                                                 |                            |
| <b>Target detected</b>                        |                     |                                                  |                                                 |                            |
| HBV DNA                                       | 87 (100)            | 54 (100)                                         | 6 (100)                                         | 27 (100)                   |
| <b>Sample types</b>                           |                     |                                                  |                                                 |                            |
| Blood                                         | 87 (100)            | 54 (100)                                         | 6 (100)                                         | 27 (100)                   |

| <b>Characteristics</b> | <b>Overall (87)</b> | <b>HBsAg negative and anti-HBc positive (54)</b> | <b>HBsAg negative and anti-HBc negative (6)</b> | <b>HBsAg negative (27)</b> |
|------------------------|---------------------|--------------------------------------------------|-------------------------------------------------|----------------------------|
| <b>Risk of bias</b>    |                     |                                                  |                                                 |                            |
| Low risk of bias       | 49 (56.3)           | 31 (57.4)                                        | 3 (50.0)                                        | 15 (55.6)                  |
| Moderate risk of bias  | 38 (43.7)           | 23 (42.6)                                        | 3 (50.0)                                        | 12 (44.4)                  |
