# Supplementary material for: Global epidemiology of occult hepatitis B virus infections in blood donors, a systematic review and meta-analysis
Source: PubMed Central journal article supplement (PMC9394819; doi:10.1371/journal.pone.0272920), 2022-08-22
Supplement: pone.0272920.s007.pdf [file pone.0272920.s007.pdf]

Appendix S7: Individual characteristics of included studies

| Author, Year of publication | Study Design    | Sampling          | Sampling method        | Setting         | Number of sites | Timing of samples collection | Countries                | WHO Region            | UNSD Region       | Country income level          | Study period                         | Age range            | Population categories              | OBI diagnostic method                         | Target detected | Sample types |
|-----------------------------|-----------------|-------------------|------------------------|-----------------|-----------------|------------------------------|--------------------------|-----------------------|-------------------|-------------------------------|--------------------------------------|----------------------|------------------------------------|-----------------------------------------------|-----------------|--------------|
| Abbasali, 2005              | Cross-sectional | Non probabilistic | Consecutive sampling   | Hospital-based  | Monocenter      | Prospectively                | Iran                     | Eastern Mediterranean | Southern Asia     | Upper-middle-income economies | Unclear/Not reported                 | Unclear/Not reported | HBsAg Negative & Anti-HBc Positive | Real-time PCR                                 | HBV DNA         | Blood        |
| Abbsai, 2016                | Cross-sectional | Non probabilistic | Consecutive sampling   | Hospital-based  | Monocenter      | Prospectively                | Iran                     | Eastern Mediterranean | Southern Asia     | Upper-middle-income economies | Oct/2013-Nov/2013                    | Adults               | HBsAg Negative & Anti-HBc Negative | Classical PCR                                 | HBV DNA         | Blood        |
| Akinbami, 2019              | Cross-sectional | Non probabilistic | Consecutive sampling   | Hospital-based  | Monocenter      | Prospectively                | Nigeria                  | Africa                | West Africa       | Lower-middle income economies | Nov/2016-Jan/2017                    | Adults               | HBsAg Negative                     | Classical PCR                                 | HBV DNA         | Blood        |
| Akram, 2018                 | Cross-sectional | Non probabilistic | Consecutive sampling   | Hospital-based  | Monocenter      | Prospectively                | Bangladesh               | South-East Asia       | Southern Asia     | Lower-middle income economies | May/2015-May/2016                    | Adults               | HBsAg Negative & Anti-HBc Positive | Loop mediated isothermal amplification (LAMP) | HBV DNA         | Blood        |
| Alizadeh, 2014              | Cross-sectional | Non probabilistic | Consecutive sampling   | Hospital-based  | Monocenter      | Prospectively                | Iran                     | Eastern Mediterranean | Southern Asia     | Upper-middle-income economies | May/2008-Mar/2009                    | Adults               | HBsAg Negative                     | Real-time PCR                                 | HBV DNA         | Blood        |
| Alshayea, 2016              | Cross-sectional | Non probabilistic | Consecutive sampling   | Hospital-based  | Monocenter      | Prospectively                | Saudi Arabia             | Eastern Mediterranean | Western Asia      | High-income economies         | Jan/2011-Jan/2012                    | Unclear/Not reported | HBsAg Negative & Anti-HBc Positive | Real-time PCR                                 | HBV DNA         | Blood        |
| Alura, 2020                 | Cross-sectional | Non probabilistic | Consecutive sampling   | Hospital-based  | Monocenter      | Prospectively                | Kenya                    | Africa                | Eastern Africa    | Lower-middle income economies | Unclear/Not reported                 | Adults               | HBsAg Negative                     | Classical PCR                                 | HBV DNA         | Blood        |
| Asim, 2010                  | Cross-sectional | Non probabilistic | Consecutive sampling   | Hospital-based  | Monocenter      | Prospectively                | India                    | South-East Asia       | Southern Asia     | Lower-middle income economies | Jan/2005-Nov/2006                    | Adults               | HBsAg Negative & Anti-HBc Positive | Classical PCR                                 | HBV DNA         | Blood        |
| Athira, 2018                | Cross-sectional | Non probabilistic | Consecutive sampling   | Hospital-based  | Monocenter      | Prospectively                | India                    | South-East Asia       | Southern Asia     | Lower-middle income economies | Jun/2015-Sep/2016                    | Unclear/Not reported | HBsAg Negative & Anti-HBc Negative | Real-time PCR                                 | HBV DNA         | Blood        |
| Athira, 2018                | Cross-sectional | Non probabilistic | Consecutive sampling   | Hospital-based  | Monocenter      | Prospectively                | India                    | South-East Asia       | Southern Asia     | Lower-middle income economies | Jun/2015-Sep/2016                    | Unclear/Not reported | HBsAg Negative & Anti-HBc Positive | Real-time PCR                                 | HBV DNA         | Blood        |
| Berkem, 2019                | Cross-sectional | Non probabilistic | Consecutive sampling   | Hospital-based  | Monocenter      | Prospectively                | Turkey                   | Europe                | Western Asia      | Upper-middle-income economies | Unclear/Not reported                 | Unclear/Not reported | HBsAg Negative & Anti-HBc Positive | Real-time PCR                                 | HBV DNA         | Blood        |
| Bhattacharya, 2007          | Cross-sectional | Non probabilistic | Consecutive sampling   | Hospital-based  | Monocenter      | Prospectively                | India                    | South-East Asia       | Southern Asia     | Lower-middle income economies | Jan/2004-Dec/2005                    | Unclear/Not reported | HBsAg Negative & Anti-HBc Positive | Real-time PCR                                 | HBV DNA         | Blood        |
| Bhatti, 2007                | Cross-sectional | Non probabilistic | Consecutive sampling   | Hospital-based  | Monocenter      | Prospectively                | Pakistan                 | Eastern Mediterranean | Southern Asia     | Lower-middle income economies | Jan/2003-Oct/2005                    | Unclear/Not reported | HBsAg Negative & Anti-HBc Positive | Real-time PCR                                 | HBV DNA         | Blood        |
| Biswas, 2013                | Cross-sectional | Non probabilistic | Consecutive sampling   | Hospital-based  | Monocenter      | Prospectively                | India                    | South-East Asia       | Southern Asia     | Lower-middle income economies | Jun/2006-May/2009                    | Unclear/Not reported | HBsAg Negative & Anti-HBc Positive | Real-time PCR                                 | HBV DNA         | Blood        |
| Chang-rong, 2009            | Cross-sectional | Non probabilistic | Consecutive sampling   | Hospital-based  | Monocenter      | Prospectively                | China                    | Western Pacific       | Eastern Asia      | Upper-middle-income economies | Unclear/Not reported                 | Adults               | HBsAg Negative                     | Classical PCR                                 | HBV DNA         | Blood        |
| Chaurasia, 2016             | Cross-sectional | Non probabilistic | Convenience sampling   | Hospital-based  | Multicenter     | Retrospectively              | India                    | South-East Asia       | Southern Asia     | Lower-middle income economies | Jan/2014-Oct/2014                    | Unclear/Not reported | HBsAg Negative                     | Real-time PCR                                 | HBV DNA         | Blood        |
| Chervier, 2007              | Cross-sectional | Non probabilistic | Consecutive sampling   | Hospital-based  | Monocenter      | Prospectively                | Canada                   | America               | Northern America  | High-income economies         | Oct/2004-Nov/2005                    | Unclear/Not reported | HBsAg Negative & Anti-HBc Positive | Classical PCR                                 | HBV DNA         | Blood        |
| Das, 2019                   | Cross-sectional | Non probabilistic | Consecutive sampling   | Hospital-based  | Monocenter      | Prospectively                | India                    | South-East Asia       | Southern Asia     | Lower-middle income economies | Nov/2013-Dec/2018                    | Unclear/Not reported | HBsAg Negative                     | Classical PCR                                 | HBV DNA         | Blood        |
| Delfino, 2021               | Cross-sectional | Non probabilistic | Consecutive sampling   | Hospital-based  | Monocenter      | Retrospectively              | Argentina                | America               | South America     | Upper-middle-income economies | 2015 - 2019                          | Unclear/Not reported | HBsAg Negative & Anti-HBc Positive | Real-time PCR                                 | HBV DNA         | Blood        |
| Doda, 2014                  | Cross-sectional | Non probabilistic | Consecutive sampling   | Hospital-based  | Monocenter      | Prospectively                | India                    | South-East Asia       | Southern Asia     | Lower-middle income economies | Jan/2012-Dec/2013                    | Unclear/Not reported | HBsAg Negative                     | Real-time PCR                                 | HBV DNA         | Blood        |
| Dodd, 2018                  | Cross-sectional | Non probabilistic | Consecutive sampling   | Hospital-based  | Multicenter     | Prospectively                | United States of America | America               | Northern America  | High-income economies         | Jul/2011-Jun/2015                    | Unclear/Not reported | HBsAg Negative & Anti-HBc Positive | Real-time PCR                                 | HBV DNA         | Blood        |
| Duseja, 2003                | Cross-sectional | Non probabilistic | Consecutive sampling   | Hospital-based  | Monocenter      | Prospectively                | India                    | South-East Asia       | Southern Asia     | Lower-middle income economies | Unclear/Not reported                 | Unclear/Not reported | HBsAg Negative                     | Classical PCR                                 | HBV DNA         | Blood        |
| El-Ghitany, 2013            | Case control    | Probabilistic     | Simple random sampling | Hospital-based  | Monocenter      | Prospectively                | Egypt                    | Eastern Mediterranean | Northern Africa   | Lower-middle income economies | Unclear/Not reported                 | Unclear/Not reported | HBsAg Negative                     | Classical PCR                                 | HBV DNA         | Blood        |
| Fernández-Galindo, 2020     | Cross-sectional | Non probabilistic | Consecutive sampling   | Hospital-based  | Multicenter     | Prospectively                | Mexico                   | America               | Central America   | Upper-middle-income economies | Unclear/Not reported                 | Unclear/Not reported | HBsAg Negative                     | Classical PCR                                 | HBV DNA         | Blood        |
| Fopa, 2019                  | Cross-sectional | Non probabilistic | Consecutive sampling   | Hospital-based  | Monocenter      | Prospectively                | Cameroon                 | Africa                | Central Africa    | Lower-middle income economies | Aug/2016-Mar/ 2017                   | Adults               | HBsAg Negative & Anti-HBc Positive | Real-time PCR                                 | HBV DNA         | Blood        |
| García-Montalvo, 2011       | Cross-sectional | Probabilistic     | Simple random sampling | Hospital-based  | Monocenter      | Prospectively                | Mexico                   | America               | Central America   | Upper-middle-income economies | Jan/2007-Jul/2008                    | Unclear/Not reported | HBsAg Negative & Anti-HBc Positive | Real-time PCR                                 | HBV DNA         | Blood        |
| García-Montalvo, 2005       | Cross-sectional | Non probabilistic | Consecutive sampling   | Hospital-based  | Monocenter      | Prospectively                | Mexico                   | America               | Central America   | Upper-middle-income economies | Jan/1999-Dec/1999                    | Unclear/Not reported | HBsAg Negative & Anti-HBc Positive | Classical PCR                                 | HBV DNA         | Blood        |
| Guo, 2017                   | Cross-sectional | Non probabilistic | Consecutive sampling   | Hospital-based  | Monocenter      | Retrospectively              | China                    | Western Pacific       | Eastern Asia      | Upper-middle-income economies | Jun/2011-Oct/2014                    | Unclear/Not reported | HBsAg Negative                     | Real-time PCR                                 | HBV DNA         | Blood        |
| Gutierrez, 2004             | Cross-sectional | Non probabilistic | Consecutive sampling   | Hospital-based  | Monocenter      | Prospectively                | Venezuela                | America               | South America     | Upper-middle-income economies | Unclear/Not reported                 | Unclear/Not reported | HBsAg Negative & Anti-HBc Negative | Classical PCR                                 | HBV DNA         | Blood        |
| Gutierrez, 2004             | Cross-sectional | Non probabilistic | Consecutive sampling   | Hospital-based  | Monocenter      | Prospectively                | Venezuela                | America               | South America     | Upper-middle-income economies | Unclear/Not reported                 | Unclear/Not reported | HBsAg Negative & Anti-HBc Positive | Classical PCR                                 | HBV DNA         | Blood        |
| Hassanshahi, 2010           | Cross-sectional | Non probabilistic | Consecutive sampling   | Hospital-based  | Monocenter      | Retrospectively              | Iran                     | Eastern Mediterranean | Southern Asia     | Upper-middle-income economies | Unclear/Not reported                 | Unclear/Not reported | HBsAg Negative & Anti-HBc Positive | Classical PCR                                 | HBV DNA         | Blood        |
| Huang, 2012                 | Cross-sectional | Non probabilistic | Consecutive sampling   | Hospital-based  | Monocenter      | Retrospectively              | China                    | Western Pacific       | Eastern Asia      | Upper-middle-income economies | 2007-2010                            | Adults               | HBsAg Negative                     | Classical PCR                                 | HBV DNA         | Blood        |
| Hudu, 2016                  | Cross-sectional | Probabilistic     | Simple random sampling | Hospital-based  | Monocenter      | Retrospectively              | Malaysia                 | Western Pacific       | Southeastern Asia | Upper-middle-income economies | Unclear/Not reported                 | Unclear/Not reported | HBsAg Negative & Anti-HBc Negative | Classical PCR                                 | HBV DNA         | Blood        |
| Hudu, 2016                  | Cross-sectional | Probabilistic     | Simple random sampling | Hospital-based  | Monocenter      | Retrospectively              | Malaysia                 | Western Pacific       | Southeastern Asia | Upper-middle-income economies | Unclear/Not reported                 | Unclear/Not reported | HBsAg Negative                     | Classical PCR                                 | HBV DNA         | Blood        |
| Hudu, 2016                  | Cross-sectional | Probabilistic     | Simple random sampling | Hospital-based  | Monocenter      | Retrospectively              | Malaysia                 | Western Pacific       | Southeastern Asia | Upper-middle-income economies | Unclear/Not reported                 | Unclear/Not reported | HBsAg Negative & Anti-HBc Positive | Classical PCR                                 | HBV DNA         | Blood        |
| Hui, 2017                   | Cross-sectional | Non probabilistic | Consecutive sampling   | Hospital-based  | Monocenter      | Prospectively                | China                    | Western Pacific       | Eastern Asia      | Upper-middle-income economies | Oct/2013-Jun/2016                    | Unclear/Not reported | HBsAg Negative & Anti-HBc Positive | Classical PCR                                 | HBV DNA         | Blood        |
| Isabel, 2009                | Cross-sectional | Non probabilistic | Consecutive sampling   | Hospital-based  | Monocenter      | Retrospectively              | Spain                    | Europe                | Southern Europe   | High-income economies         | Unclear/Not reported                 | Unclear/Not reported | HBsAg Negative & Anti-HBc Positive | Classical PCR                                 | HBV DNA         | Blood        |
| Ismail, 2012                | Cross-sectional | Non probabilistic | Consecutive sampling   | Hospital-based  | Monocenter      | Prospectively                | India                    | South-East Asia       | Southern Asia     | Lower-middle income economies | Oct/2008                             | All ages             | HBsAg Negative & Anti-HBc Positive | Real-time PCR                                 | HBV DNA         | Blood        |
| Jafarzadeh, 2008            | Cross-sectional | Non probabilistic | Consecutive sampling   | Hospital-based  | Monocenter      | Prospectively                | Iran                     | Eastern Mediterranean | Southern Asia     | Upper-middle-income economies | Dec/2004-Dec/2005                    | Adults               | HBsAg Negative & Anti-HBc Positive | Real-time PCR                                 | HBV DNA         | Blood        |
| Jutavittum, 2014            | Cross-sectional | Probabilistic     | Simple random sampling | Hospital-based  | Monocenter      | Prospectively                | Laos                     | Western Pacific       | Southeastern Asia | Lower-middle income economies | Mar-Jun/2006                         | Adults               | HBsAg Negative & Anti-HBc Positive | Real-time PCR                                 | HBV DNA         | Blood        |
| Kanwal, 2020                | Cross-sectional | Non probabilistic | Consecutive sampling   | Hospital-based  | Monocenter      | Retrospectively              | Pakistan                 | Eastern Mediterranean | Southern Asia     | Lower-middle income economies | Jun/2014-Dec/2016                    | Adults               | HBsAg Negative & Anti-HBc Positive | Real-time PCR                                 | HBV DNA         | Blood        |
| Karimabad, 2011             | Cross-sectional | Non probabilistic | Consecutive sampling   | Hospital-based  | Monocenter      | Retrospectively              | Iran                     | Eastern Mediterranean | Southern Asia     | Upper-middle-income economies | Unclear/Not reported                 | Unclear/Not reported | HBsAg Negative & Anti-HBc Positive | Classical PCR                                 | HBV DNA         | Blood        |
| Keechilol, 2016             | Cross-sectional | Non probabilistic | Consecutive sampling   | Hospital-based  | Multicenter     | Prospectively                | India                    | South-East Asia       | Southern Asia     | Lower-middle income economies | Mar/2014-Oct/2015                    | Unclear/Not reported | HBsAg Negative                     | Real-time PCR                                 | HBV DNA         | Blood        |
| Khamesipour, 2011           | Cross-sectional | Probabilistic     | Simple random sampling | Hospital-based  | Monocenter      | Retrospectively              | Iran                     | Eastern Mediterranean | Southern Asia     | Upper-middle-income economies | Unclear/Not reported                 | Adults               | HBsAg Negative & Anti-HBc Positive | Real-time PCR                                 | HBV DNA         | Blood        |
| Kishk, 2015                 | Cross-sectional | Probabilistic     | Simple random sampling | Hospital-based  | Monocenter      | Retrospectively              | Egypt                    | Eastern Mediterranean | Northern Africa   | Lower-middle income economies | Unclear/Not reported                 | Adults               | HBsAg Negative & Anti-HBc Positive | Real-time PCR                                 | HBV DNA         | Blood        |
| Kleinman, 2003              | Cross-sectional | Non probabilistic | Consecutive sampling   | Hospital-based  | Multicenter     | Retrospectively              | United States of America | America               | Northern America  | High-income economies         | 1991-1995                            | Unclear/Not reported | HBsAg Negative & Anti-HBc Positive | Classical PCR                                 | HBV DNA         | Blood        |
| Ks, 2012                    | Cross-sectional | Non probabilistic | Consecutive sampling   | Hospital-based  | Monocenter      | Prospectively                | India                    | South-East Asia       | Southern Asia     | Lower-middle income economies | 2008-2009                            | Adults               | HBsAg Negative & Anti-HBc Positive | Real-time PCR                                 | HBV DNA         | Blood        |
| liao, 2017                  | Cross-sectional | Non probabilistic | Consecutive sampling   | Hospital-based  | Monocenter      | Retrospectively              | China                    | Western Pacific       | Eastern Asia      | Upper-middle-income economies | Dec/2011-Mar/2015                    | Unclear/Not reported | HBsAg Negative                     | Classical PCR                                 | HBV DNA         | Blood        |
| Lie-Yong, 2011              | Cross-sectional | Non probabilistic | Consecutive sampling   | Hospital-based  | Monocenter      | Prospectively                | China                    | Western Pacific       | Eastern Asia      | Upper-middle-income economies | Unclear/Not reported                 | Unclear/Not reported | HBsAg Negative                     | Classical PCR                                 | HBV DNA         | Blood        |
| liu, 2010                   | Cross-sectional | Probabilistic     | Simple random sampling | Hospital-based  | Monocenter      | Prospectively                | China                    | Western Pacific       | Eastern Asia      | Upper-middle-income economies | Feb/2007-Apr/2008                    | Adults               | HBsAg Negative                     | Real-time PCR                                 | HBV DNA         | Blood        |
| Mabunda, 2020               | Cross-sectional | Non probabilistic | Consecutive sampling   | Hospital-based  | Monocenter      | Prospectively                | Mozambique               | Africa                | Eastern Africa    | Low-income economies          | Nov/2014-Oct/2015                    | Unclear/Not reported | HBsAg Negative                     | Real-time PCR                                 | HBV DNA         | Blood        |
| Magvansuren, 2015           | Cross-sectional | Non probabilistic | Consecutive sampling   | Hospital-based  | Monocenter      | Prospectively                | Mongolia                 | Western Pacific       | Eastern Asia      | Lower-middle income economies | 2013                                 | Unclear/Not reported | HBsAg Negative                     | Real-time PCR                                 | HBV DNA         | Blood        |
| Mahgoub, 2011               | Cross-sectional | Probabilistic     | Simple random sampling | Hospital-based  | Multicenter     | Retrospectively              | Sudan                    | Eastern Mediterranean | Northern Africa   | Low-income economies          | Feb/2008-Aug/2008                    | Adults               | HBsAg Negative & Anti-HBc Positive | Real-time PCR                                 | HBV DNA         | Blood        |
| Mahmoud, 2018               | Cross-sectional | Probabilistic     | Simple random sampling | Hospital-based  | Monocenter      | Prospectively                | Egypt                    | Eastern Mediterranean | Northern Africa   | Lower-middle income economies | Unclear/Not reported                 | Unclear/Not reported | HBsAg Negative & Anti-HBc Negative | Real-time PCR                                 | HBV DNA         | Blood        |
| Mahmoud, 2018               | Cross-sectional | Probabilistic     | Simple random sampling | Hospital-based  | Monocenter      | Prospectively                | Egypt                    | Eastern Mediterranean | Northern Africa   | Lower-middle income economies | Unclear/Not reported                 | Unclear/Not reported | HBsAg Negative & Anti-HBc Positive | Real-time PCR                                 | HBV DNA         | Blood        |
| Manzini, 2007               | Cross-sectional | Non probabilistic | Consecutive sampling   | Hospital-based  | Multicenter     | Retrospectively              | Italy                    | Europe                | Southern Europe   | High-income economies         | Mar/2005 - Nov/2005                  | Adults               | HBsAg Negative & Anti-HBc Positive | Classical PCR                                 | HBV DNA         | Blood        |
| Mardian, 2017               | Cross-sectional | Non probabilistic | Consecutive sampling   | Hospital-based  | Multicenter     | Retrospectively              | Indonesia                | South-East Asia       | Southeastern Asia | Upper-middle-income economies | Apr/2013 - Nov/2014                  | Adults               | HBsAg Negative                     | Real-time PCR                                 | HBV DNA         | Blood        |
| Mehmood, 2020               | Cross-sectional | Probabilistic     | Simple random sampling | Hospital-based  | Monocenter      | Retrospectively              | Pakistan                 | Eastern Mediterranean | Southern Asia     | Lower-middle income economies | Apr/2015 - Jun/2015                  | Adults               | HBsAg Negative & Anti-HBc Positive | Real-time PCR                                 | HBV DNA         | Blood        |
| Moresco, 2014               | Cross-sectional | Non probabilistic | Consecutive sampling   | Hospital-based  | Monocenter      | Prospectively                | Brazil                   | America               | South America     | Upper-middle-income economies | Jun/2011-Jun/2012                    | Unclear/Not reported | HBsAg Negative & Anti-HBc Positive | Real-time PCR                                 | HBV DNA         | Blood        |
| Muselmani, 2013             | Cross-sectional | Non probabilistic | Consecutive sampling   | Hospital-based  | Monocenter      | Prospectively                | Syria                    | Eastern Mediterranean | Western Asia      | Low-income economies          | July/2011                            | Unclear/Not reported | HBsAg Negative & Anti-HBc Positive | Real-time PCR                                 | HBV DNA         | Blood        |
| Muselmani, 2014             | Cross-sectional | Non probabilistic | Consecutive sampling   | Hospital-based  | Multicenter     | Prospectively                | Syria                    | Eastern Mediterranean | Western Asia      | Low-income economies          | 2011                                 | Unclear/Not reported | HBsAg Negative & Anti-HBc Positive | Real-time PCR                                 | HBV DNA         | Blood        |
| Olotu, 2016                 | Cross-sectional | Non probabilistic | Consecutive sampling   | Hospital-based  | Monocenter      | Prospectively                | Nigeria                  | Africa                | West Africa       | Lower-middle income economies | Jun/2013-Jan/2014                    | Unclear/Not reported | HBsAg Negative & Anti-HBc Positive | Real-time PCR                                 | HBV DNA         | Blood        |
| Oluyinka, 2015              | Cross-sectional | Probabilistic     | Simple random sampling | Hospital-based  | Multicenter     | Prospectively                | Nigeria                  | Africa                | West Africa       | Lower-middle income economies | Unclear/Not reported                 | Unclear/Not reported | HBsAg Negative                     | Real-time PCR                                 | HBV DNA         | Blood        |
| Osuji, 2020                 | Cross-sectional | Non probabilistic | Consecutive sampling   | Hospital-based  | Multicenter     | Prospectively                | Nigeria                  | Africa                | West Africa       | Lower-middle income economies | Unclear/Not reported                 | Unclear/Not reported | HBsAg Negative                     | Real-time PCR                                 | HBV DNA         | Blood        |
| Panigrahi, 2010             | Cross-sectional | Non probabilistic | Consecutive sampling   | Community-based | Multicenter     | Prospectively                | India                    | South-East Asia       | Southern Asia     | Lower-middle income economies | Dec/2008-Jul/2009                    | Unclear/Not reported | HBsAg Negative & Anti-HBc Positive | Real-time PCR                                 | HBV DNA         | Blood        |
| Pisano, 2016                | Cross-sectional | Non probabilistic | Consecutive sampling   | Hospital-based  | Monocenter      | Prospectively                | Argentina                | America               | South America     | Upper-middle-income economies | Jul/2011-Feb/2014                    | Unclear/Not reported | HBsAg Negative & Anti-HBc Negative | Real-time PCR                                 | HBV DNA         | Blood        |
| Rios-Ocampo, 2014           | Cross-sectional | Non probabilistic | Convenience sampling   | Hospital-based  | Monocenter      | Prospectively                | Colombia                 | America               | South America     | Upper-middle-income economies | Feb/2011-Sep/2011                    | Unclear/Not reported | HBsAg Negative & Anti-HBc Positive | Real-time PCR                                 | HBV DNA         | Blood        |
| Said, 2013                  | Cross-sectional | Non probabilistic | Convenience sampling   | Hospital-based  | Multicenter     | Prospectively                | Egypt                    | Eastern Mediterranean | Northern Africa   | Lower-middle income economies | Unclear/Not reported                 | Adults               | HBsAg Negative & Anti-HBc Positive | Real-time PCR                                 | HBV DNA         | Blood        |
| Seo, 2011                   | Cross-sectional | Non probabilistic | Consecutive sampling   | Hospital-based  | Monocenter      | Prospectively                | South Korea              | Western Pacific       | Eastern Asia      | High-income economies         | Apr/2008-Oct/2008                    | Unclear/Not reported | HBsAg Negative & Anti-HBc Positive | Real-time PCR                                 | HBV DNA         | Blood        |
| Shang, 2009                 | Cross-sectional | Non probabilistic | Convenience sampling   | Hospital-based  | Monocenter      | Prospectively                | China                    | Western Pacific       | Eastern Asia      | Upper-middle-income economies | Aug/2006-Dec/2006; Jul/2007-Feb/2008 | Unclear/Not reported | HBsAg Negative                     | Real-time PCR                                 | HBV DNA         | Blood        |
