# Supplementary material for: Global epidemiology of occult hepatitis B virus infections in blood donors, a systematic review and meta-analysis
Source: PubMed Central journal article supplement (PMC9394819; doi:10.1371/journal.pone.0272920), 2022-08-22
Supplement: pone.0272920.s008.pdf [file pone.0272920.s008.pdf]

Appendix S8: Risk of bias assessment

| Author, Year of publication | Was the study's target population a close representation of the national population in relation to OBI prevalence or CFR in blood donors? | Was the sampling frame a true or close representation of the target population? | Was some form of random selection used to select the sample, OR was acensus undertaken? | Were data collected directly from the subjects (as opposed to a proxy)? | Was an acceptable inclusion criteria definition used in the study? | Did the author calculate and respect the expected sample size? | Was the OBI detection assay shown to have reliability and validity? | Was the same mode of data collection used for all subjects? | Was the length of the study period > or = 1 year? | Were the numerator(s) and denominator(s) for the OCI prevalence/CFR appropriate? | Risk of bias          | Population categories              |
|-----------------------------|-------------------------------------------------------------------------------------------------------------------------------------------|---------------------------------------------------------------------------------|-----------------------------------------------------------------------------------------|-------------------------------------------------------------------------|--------------------------------------------------------------------|----------------------------------------------------------------|---------------------------------------------------------------------|-------------------------------------------------------------|---------------------------------------------------|----------------------------------------------------------------------------------|-----------------------|------------------------------------|
| Abbasali, 2005              | No                                                                                                                                        | Yes                                                                             | No                                                                                      | Yes                                                                     | Yes                                                                | No                                                             | Yes                                                                 | Yes                                                         | Unclear                                           | Yes                                                                              | Moderate risk of bias | HBsAg Negative & Anti-HBc Positive |
| Abbasi, 2016                | No                                                                                                                                        | Yes                                                                             | No                                                                                      | Yes                                                                     | Yes                                                                | No                                                             | Yes                                                                 | Yes                                                         | No                                                | Yes                                                                              | Moderate risk of bias | HBsAg Negative & Anti-HBc Negative |
| Akinbami, 2019              | No                                                                                                                                        | Yes                                                                             | No                                                                                      | Yes                                                                     | Yes                                                                | No                                                             | Yes                                                                 | Yes                                                         | No                                                | Yes                                                                              | Moderate risk of bias | HBsAg Negative                     |
| Akram, 2018                 | No                                                                                                                                        | Yes                                                                             | No                                                                                      | Yes                                                                     | Yes                                                                | No                                                             | Yes                                                                 | Yes                                                         | Yes                                               | Yes                                                                              | Low risk of bias      | HBsAg Negative & Anti-HBc Positive |
| Alizadeh, 2014              | No                                                                                                                                        | Yes                                                                             | No                                                                                      | Yes                                                                     | Yes                                                                | No                                                             | Yes                                                                 | Yes                                                         | No                                                | Yes                                                                              | Moderate risk of bias | HBsAg Negative                     |
| Alshayea, 2016              | No                                                                                                                                        | Yes                                                                             | No                                                                                      | Yes                                                                     | Yes                                                                | No                                                             | Yes                                                                 | Yes                                                         | Yes                                               | Yes                                                                              | Low risk of bias      | HBsAg Negative & Anti-HBc Positive |
| Aluora, 2020                | No                                                                                                                                        | Yes                                                                             | No                                                                                      | Yes                                                                     | Yes                                                                | Yes                                                            | Yes                                                                 | Yes                                                         | Unclear                                           | Yes                                                                              | Low risk of bias      | HBsAg Negative                     |
| Asim, 2010                  | No                                                                                                                                        | Yes                                                                             | No                                                                                      | Yes                                                                     | Yes                                                                | No                                                             | Yes                                                                 | Yes                                                         | Yes                                               | Yes                                                                              | Low risk of bias      | HBsAg Negative & Anti-HBc Positive |
| Athira, 2018                | No                                                                                                                                        | Yes                                                                             | No                                                                                      | Yes                                                                     | Yes                                                                | No                                                             | Yes                                                                 | Yes                                                         | Yes                                               | Yes                                                                              | Low risk of bias      | HBsAg Negative & Anti-HBc Negative |
| Athira, 2018                | No                                                                                                                                        | Yes                                                                             | No                                                                                      | Yes                                                                     | Yes                                                                | No                                                             | Yes                                                                 | Yes                                                         | Yes                                               | Yes                                                                              | Low risk of bias      | HBsAg Negative & Anti-HBc Positive |
| Berkem, 2019                | No                                                                                                                                        | Yes                                                                             | No                                                                                      | Yes                                                                     | Yes                                                                | Unclear                                                        | Yes                                                                 | Yes                                                         | Unclear                                           | Yes                                                                              | Moderate risk of bias | HBsAg Negative & Anti-HBc Positive |
| Bhattacharya, 2007          | No                                                                                                                                        | Yes                                                                             | No                                                                                      | Yes                                                                     | Yes                                                                | No                                                             | Yes                                                                 | Yes                                                         | Yes                                               | Yes                                                                              | Low risk of bias      | HBsAg Negative & Anti-HBc Positive |
| Bhatti, 2007                | No                                                                                                                                        | Yes                                                                             | No                                                                                      | Yes                                                                     | Yes                                                                | No                                                             | Yes                                                                 | Yes                                                         | Yes                                               | Yes                                                                              | Low risk of bias      | HBsAg Negative & Anti-HBc Positive |
| Biswas, 2013                | No                                                                                                                                        | Yes                                                                             | No                                                                                      | Yes                                                                     | Yes                                                                | No                                                             | Yes                                                                 | Yes                                                         | Yes                                               | Yes                                                                              | Low risk of bias      | HBsAg Negative & Anti-HBc Positive |
| Chang-rong, 2009            | No                                                                                                                                        | Yes                                                                             | No                                                                                      | Yes                                                                     | Yes                                                                | Unclear                                                        | Yes                                                                 | Yes                                                         | Unclear                                           | Yes                                                                              | Moderate risk of bias | HBsAg Negative                     |
| Chaurasia, 2016             | No                                                                                                                                        | Yes                                                                             | No                                                                                      | Yes                                                                     | Yes                                                                | No                                                             | Yes                                                                 | Yes                                                         | No                                                | Yes                                                                              | Moderate risk of bias | HBsAg Negative                     |
| Chevrier, 2007              | No                                                                                                                                        | Yes                                                                             | No                                                                                      | Yes                                                                     | Yes                                                                | No                                                             | Yes                                                                 | Yes                                                         | Yes                                               | Yes                                                                              | Low risk of bias      | HBsAg Negative & Anti-HBc Positive |
| Das, 2019                   | No                                                                                                                                        | Yes                                                                             | No                                                                                      | Yes                                                                     | Yes                                                                | No                                                             | Yes                                                                 | Yes                                                         | Yes                                               | Yes                                                                              | Low risk of bias      | HBsAg Negative                     |
| Delfino, 2021               | No                                                                                                                                        | Yes                                                                             | No                                                                                      | Yes                                                                     | Yes                                                                | No                                                             | Yes                                                                 | Yes                                                         | Yes                                               | Yes                                                                              | Low risk of bias      | HBsAg Negative & Anti-HBc Positive |
| Doda, 2014                  | No                                                                                                                                        | Yes                                                                             | No                                                                                      | Yes                                                                     | Yes                                                                | No                                                             | Yes                                                                 | Yes                                                         | Yes                                               | Yes                                                                              | Low risk of bias      | HBsAg Negative                     |
| Dodd, 2018                  | No                                                                                                                                        | Yes                                                                             | No                                                                                      | Yes                                                                     | Yes                                                                | No                                                             | Yes                                                                 | Yes                                                         | Yes                                               | Yes                                                                              | Low risk of bias      | HBsAg Negative & Anti-HBc Positive |
| Duseja, 2003                | No                                                                                                                                        | Yes                                                                             | Unclear                                                                                 | Yes                                                                     | Yes                                                                | Unclear                                                        | Yes                                                                 | Unclear                                                     | Unclear                                           | Yes                                                                              | Moderate risk of bias | HBsAg Negative                     |
| El-Ghitany, 2013            | No                                                                                                                                        | Yes                                                                             | Yes                                                                                     | Yes                                                                     | Yes                                                                | Yes                                                            | Yes                                                                 | Yes                                                         | Unclear                                           | Yes                                                                              | Low risk of bias      | HBsAg Negative                     |
| Fernández-Galindo, 2020     | No                                                                                                                                        | Yes                                                                             | No                                                                                      | Yes                                                                     | Yes                                                                | No                                                             | Yes                                                                 | Yes                                                         | Unclear                                           | Yes                                                                              | Moderate risk of bias | HBsAg Negative                     |
| Fopa, 2019                  | No                                                                                                                                        | Yes                                                                             | No                                                                                      | Yes                                                                     | Yes                                                                | No                                                             | Yes                                                                 | Yes                                                         | No                                                | Yes                                                                              | Moderate risk of bias | HBsAg Negative & Anti-HBc Positive |
| García-Montalvo, 2005       | No                                                                                                                                        | Yes                                                                             | No                                                                                      | Yes                                                                     | Yes                                                                | No                                                             | Yes                                                                 | Yes                                                         | Yes                                               | Yes                                                                              | Low risk of bias      | HBsAg Negative & Anti-HBc Positive |
| García-Montalvo, 2011       | No                                                                                                                                        | Yes                                                                             | Yes                                                                                     | Yes                                                                     | Yes                                                                | No                                                             | Yes                                                                 | Yes                                                         | Yes                                               | Yes                                                                              | Low risk of bias      | HBsAg Negative & Anti-HBc Positive |
| Guo, 2017                   | No                                                                                                                                        | Yes                                                                             | No                                                                                      | Yes                                                                     | Yes                                                                | No                                                             | Yes                                                                 | Yes                                                         | Yes                                               | Yes                                                                              | Low risk of bias      | HBsAg Negative                     |
| Gutierrez, 2004             | No                                                                                                                                        | Yes                                                                             | No                                                                                      | Yes                                                                     | Yes                                                                | No                                                             | Yes                                                                 | Yes                                                         | Unclear                                           | Yes                                                                              | Moderate risk of bias | HBsAg Negative & Anti-HBc Negative |
| Gutierrez, 2004             | No                                                                                                                                        | Yes                                                                             | No                                                                                      | Yes                                                                     | Yes                                                                | No                                                             | Yes                                                                 | Yes                                                         | Unclear                                           | Yes                                                                              | Moderate risk of bias | HBsAg Negative & Anti-HBc Positive |
| Hassanshahi, 2010           | No                                                                                                                                        | Yes                                                                             | No                                                                                      | Yes                                                                     | Yes                                                                | No                                                             | Yes                                                                 | Yes                                                         | Unclear                                           | Yes                                                                              | Moderate risk of bias | HBsAg Negative & Anti-HBc Positive |
| Huang, 2012                 | No                                                                                                                                        | Yes                                                                             | No                                                                                      | Yes                                                                     | Yes                                                                | No                                                             | Yes                                                                 | Yes                                                         | Yes                                               | Yes                                                                              | Low risk of bias      | HBsAg Negative                     |
| Hudu, 2016                  | No                                                                                                                                        | Yes                                                                             | Yes                                                                                     | Yes                                                                     | Yes                                                                | No                                                             | Yes                                                                 | Yes                                                         | Unclear                                           | Yes                                                                              | Low risk of bias      | HBsAg Negative & Anti-HBc Negative |
| Hudu, 2016                  | No                                                                                                                                        | Yes                                                                             | Yes                                                                                     | Yes                                                                     | Yes                                                                | No                                                             | Yes                                                                 | Yes                                                         | Unclear                                           | Yes                                                                              | Low risk of bias      | HBsAg Negative                     |
| Hudu, 2016                  | No                                                                                                                                        | Yes                                                                             | Yes                                                                                     | Yes                                                                     | Yes                                                                | No                                                             | Yes                                                                 | Yes                                                         | Unclear                                           | Yes                                                                              | Low risk of bias      | HBsAg Negative & Anti-HBc Positive |
| Hui, 2017                   | No                                                                                                                                        | Yes                                                                             | No                                                                                      | Yes                                                                     | Yes                                                                | No                                                             | Yes                                                                 | Yes                                                         | Yes                                               | Yes                                                                              | Low risk of bias      | HBsAg Negative & Anti-HBc Positive |
| Isabel, 2009                | No                                                                                                                                        | Yes                                                                             | No                                                                                      | Yes                                                                     | Yes                                                                | No                                                             | Yes                                                                 | Yes                                                         | Unclear                                           | Yes                                                                              | Moderate risk of bias | HBsAg Negative & Anti-HBc Positive |
| Ismail, 2012                | No                                                                                                                                        | Yes                                                                             | No                                                                                      | Yes                                                                     | Yes                                                                | No                                                             | Yes                                                                 | Yes                                                         | No                                                | Yes                                                                              | Moderate risk of bias | HBsAg Negative & Anti-HBc Positive |
| Jafarzadeh, 2008            | No                                                                                                                                        | Yes                                                                             | No                                                                                      | Yes                                                                     | Yes                                                                | No                                                             | Yes                                                                 | Yes                                                         | Yes                                               | Yes                                                                              | Low risk of bias      | HBsAg Negative & Anti-HBc Positive |
| Jutavijittum, 2014          | No                                                                                                                                        | Yes                                                                             | Yes                                                                                     | Yes                                                                     | Yes                                                                | No                                                             | Yes                                                                 | Yes                                                         | No                                                | Yes                                                                              | Low risk of bias      | HBsAg Negative & Anti-HBc Positive |
| Kanwal, 2020                | No                                                                                                                                        | Yes                                                                             | No                                                                                      | Yes                                                                     | Yes                                                                | Yes                                                            | Yes                                                                 | Yes                                                         | Yes                                               | Yes                                                                              | Low risk of bias      | HBsAg Negative & Anti-HBc Positive |
| Karimabad, 2011             | No                                                                                                                                        | Yes                                                                             | No                                                                                      | Yes                                                                     | Yes                                                                | No                                                             | Yes                                                                 | Yes                                                         | Unclear                                           | Yes                                                                              | Moderate risk of bias | HBsAg Negative & Anti-HBc Positive |
| Keechilot, 2016             | No                                                                                                                                        | Yes                                                                             | No                                                                                      | Yes                                                                     | Yes                                                                | No                                                             | Yes                                                                 | Yes                                                         | Yes                                               | Yes                                                                              | Low risk of bias      | HBsAg Negative                     |
| Khamesipour, 2011           | No                                                                                                                                        | Yes                                                                             | Yes                                                                                     | Yes                                                                     | Yes                                                                | No                                                             | Yes                                                                 | Yes                                                         | Unclear                                           | Yes                                                                              | Low risk of bias      | HBsAg Negative & Anti-HBc Positive |
| Kishk, 2015                 | No                                                                                                                                        | Yes                                                                             | Yes                                                                                     | Yes                                                                     | Yes                                                                | No                                                             | Yes                                                                 | Yes                                                         | Unclear                                           | Yes                                                                              | Low risk of bias      | HBsAg Negative & Anti-HBc Positive |
| Kleinman, 2003              | No                                                                                                                                        | Yes                                                                             | No                                                                                      | Yes                                                                     | Yes                                                                | No                                                             | Yes                                                                 | Yes                                                         | Yes                                               | Yes                                                                              | Low risk of bias      | HBsAg Negative & Anti-HBc Positive |
| Ks, 2012                    | No                                                                                                                                        | Yes                                                                             | No                                                                                      | Yes                                                                     | Yes                                                                | No                                                             | Yes                                                                 | Yes                                                         | Yes                                               | Yes                                                                              | Low risk of bias      | HBsAg Negative & Anti-HBc Positive |
| liao, 2017                  | No                                                                                                                                        | Yes                                                                             | No                                                                                      | Yes                                                                     | Yes                                                                | No                                                             | Yes                                                                 | Yes                                                         | Yes                                               | Yes                                                                              | Low risk of bias      | HBsAg Negative                     |
| Lie-Yong, 2011              | No                                                                                                                                        | Yes                                                                             | Unclear                                                                                 | Yes                                                                     | Yes                                                                | Unclear                                                        | Yes                                                                 | Yes                                                         | Unclear                                           | Yes                                                                              | Moderate risk of bias | HBsAg Negative                     |
| liu , 2010                  | No                                                                                                                                        | Yes                                                                             | Yes                                                                                     | Yes                                                                     | Yes                                                                | No                                                             | Yes                                                                 | Yes                                                         | Yes                                               | Yes                                                                              | Low risk of bias      | HBsAg Negative                     |
| Mabunda, 2020               | No                                                                                                                                        | Yes                                                                             | No                                                                                      | Yes                                                                     | Yes                                                                | No                                                             | Yes                                                                 | Yes                                                         | Yes                                               | Yes                                                                              | Low risk of bias      | HBsAg Negative                     |
| Magvansuren, 2015           | No                                                                                                                                        | Yes                                                                             | No                                                                                      | Yes                                                                     | Yes                                                                | No                                                             | Yes                                                                 | Yes                                                         | Unclear                                           | Yes                                                                              | Moderate risk of bias | HBsAg Negative                     |
| Mahgoub, 2011               | No                                                                                                                                        | Yes                                                                             | Yes                                                                                     | Yes                                                                     | Yes                                                                | No                                                             | Yes                                                                 | Yes                                                         | No                                                | Yes                                                                              | Low risk of bias      | HBsAg Negative & Anti-HBc Positive |
| Mahmoud, 2018               | No                                                                                                                                        | Yes                                                                             | Yes                                                                                     | Yes                                                                     | Yes                                                                | No                                                             | Yes                                                                 | Unclear                                                     | Unclear                                           | Yes                                                                              | Moderate risk of bias | HBsAg Negative & Anti-HBc Negative |
| Mahmoud, 2018               | No                                                                                                                                        | Yes                                                                             | Yes                                                                                     | Yes                                                                     | Yes                                                                | No                                                             | Yes                                                                 | Unclear                                                     | Unclear                                           | Yes                                                                              | Moderate risk of bias | HBsAg Negative & Anti-HBc Positive |
| Manzini, 2007               | No                                                                                                                                        | Yes                                                                             | No                                                                                      | Yes                                                                     | Yes                                                                | No                                                             | Yes                                                                 | Yes                                                         | No                                                | Yes                                                                              | Moderate risk of bias | HBsAg Negative & Anti-HBc Positive |
| Mardian, 2017               | No                                                                                                                                        | Yes                                                                             | No                                                                                      | Yes                                                                     | Yes                                                                | No                                                             | Yes                                                                 | Yes                                                         | Yes                                               | Yes                                                                              | Low risk of bias      | HBsAg Negative                     |

|                   |    |     |         |     |     |         |     |     |         |     |                       |                                    |
|-------------------|----|-----|---------|-----|-----|---------|-----|-----|---------|-----|-----------------------|------------------------------------|
| Mehmood, 2020     | No | Yes | Yes     | Yes | Yes | No      | Yes | Yes | No      | Yes | Low risk of bias      | HBsAg Negative & Anti-HBc Positive |
| Moresco, 2014     | No | Yes | No      | Yes | Yes | No      | Yes | Yes | Yes     | Yes | Low risk of bias      | HBsAg Negative & Anti-HBc Positive |
| Muselmani, 2013   | No | Yes | No      | Yes | Yes | No      | Yes | Yes | No      | Yes | Moderate risk of bias | HBsAg Negative & Anti-HBc Positive |
| Muselmani, 2014   | No | Yes | No      | Yes | Yes | No      | Yes | Yes | Unclear | Yes | Moderate risk of bias | HBsAg Negative & Anti-HBc Positive |
| Olotu, 2016       | No | Yes | No      | Yes | Yes | No      | Yes | Yes | No      | Yes | Moderate risk of bias | HBsAg Negative & Anti-HBc Positive |
| Oluyinka, 2015    | No | Yes | Yes     | Yes | Yes | No      | Yes | Yes | Unclear | Yes | Low risk of bias      | HBsAg Negative                     |
| Osuji, 2020       | No | Yes | No      | Yes | Yes | No      | Yes | Yes | Unclear | Yes | Moderate risk of bias | HBsAg Negative                     |
| Panigrahi, 2010   | No | Yes | No      | Yes | Yes | No      | Yes | Yes | No      | Yes | Moderate risk of bias | HBsAg Negative & Anti-HBc Positive |
| Pisano, 2016      | No | Yes | No      | Yes | Yes | No      | Yes | Yes | Yes     | Yes | Low risk of bias      | HBsAg Negative & Anti-HBc Negative |
| Rios-Ocampo, 2014 | No | Yes | No      | Yes | Yes | No      | Yes | Yes | No      | Yes | Moderate risk of bias | HBsAg Negative & Anti-HBc Positive |
| Said, 2013        | No | Yes | No      | Yes | Yes | No      | Yes | Yes | Unclear | Yes | Moderate risk of bias | HBsAg Negative & Anti-HBc Positive |
| Seo, 2011         | No | Yes | No      | Yes | Yes | No      | Yes | Yes | No      | Yes | Moderate risk of bias | HBsAg Negative & Anti-HBc Positive |
| Shang, 2009       | No | Yes | No      | Yes | Yes | No      | Yes | Yes | No      | Yes | Moderate risk of bias | HBsAg Negative                     |
| Sharifi, 2013     | No | Yes | No      | Yes | Yes | Unclear | Yes | Yes | Unclear | Yes | Moderate risk of bias | HBsAg Negative & Anti-HBc Positive |
| Sheng, 2013       | No | Yes | No      | Yes | Yes | No      | Yes | Yes | Unclear | Yes | Moderate risk of bias | HBsAg Negative & Anti-HBc Positive |
| Silva, 2005       | No | Yes | No      | Yes | Yes | No      | Yes | Yes | Unclear | Yes | Moderate risk of bias | HBsAg Negative & Anti-HBc Positive |
| Sofian, 2010      | No | Yes | No      | Yes | Yes | No      | Yes | Yes | Unclear | Yes | Moderate risk of bias | HBsAg Negative & Anti-HBc Positive |
| Sosa-Jurado, 2016 | No | Yes | No      | Yes | Yes | No      | Yes | Yes | Yes     | Yes | Low risk of bias      | HBsAg Negative & Anti-HBc Positive |
| Stramer, 2012     | No | Yes | No      | Yes | Yes | No      | Yes | Yes | Yes     | Yes | Low risk of bias      | HBsAg Negative & Anti-HBc Positive |
| Taira, 2013       | No | Yes | No      | Yes | Yes | No      | Yes | Yes | Yes     | Yes | Low risk of bias      | HBsAg Negative & Anti-HBc Positive |
| Thedja, 2010      | No | Yes | No      | Yes | Yes | No      | Yes | Yes | Yes     | Yes | Low risk of bias      | HBsAg Negative & Anti-HBc Positive |
| Vaezjalali, 2013  | No | Yes | No      | Yes | Yes | Yes     | Yes | Yes | Unclear | Yes | Low risk of bias      | HBsAg Negative & Anti-HBc Positive |
| Wolff, 2011       | No | Yes | Yes     | Yes | Yes | No      | Yes | Yes | Yes     | Yes | Low risk of bias      | HBsAg Negative & Anti-HBc Negative |
| Ye, 2017          | No | Yes | No      | Yes | Yes | No      | Yes | Yes | Unclear | Yes | Moderate risk of bias | HBsAg Negative & Anti-HBc Positive |
| Yong-Ping, 2011   | No | Yes | Unclear | Yes | Yes | Unclear | Yes | Yes | Unclear | Yes | Moderate risk of bias | HBsAg Negative                     |
| Yotsuyanagi, 2001 | No | Yes | No      | Yes | Yes | No      | Yes | Yes | No      | Yes | Moderate risk of bias | HBsAg Negative & Anti-HBc Positive |
| Yu, 2012          | No | Yes | Unclear | Yes | Yes | Unclear | Yes | Yes | Unclear | Yes | Moderate risk of bias | HBsAg Negative                     |
| Yuan, 2010        | No | Yes | No      | Yes | Yes | No      | Yes | Yes | Yes     | Yes | Low risk of bias      | HBsAg Negative & Anti-HBc Positive |
| Yuen, 2010        | No | Yes | Yes     | Yes | Yes | No      | Yes | Yes | Yes     | Yes | Low risk of bias      | HBsAg Negative                     |
| Zheng, 2011       | No | Yes | No      | Yes | Yes | No      | Yes | Yes | Yes     | Yes | Low risk of bias      | HBsAg Negative                     |
