# Supplementary material for: Global epidemiology of occult hepatitis B virus infections in blood donors, a systematic review and meta-analysis
Source: PubMed Central journal article supplement (PMC9394819; doi:10.1371/journal.pone.0272920), 2022-08-22
Supplement: pone.0272920.s013.pdf [file pone.0272920.s013.pdf]

Appendix S12. Funnel chart for publications of the occult hepatitis B virus prevalence in HBsAg negative blood donors.

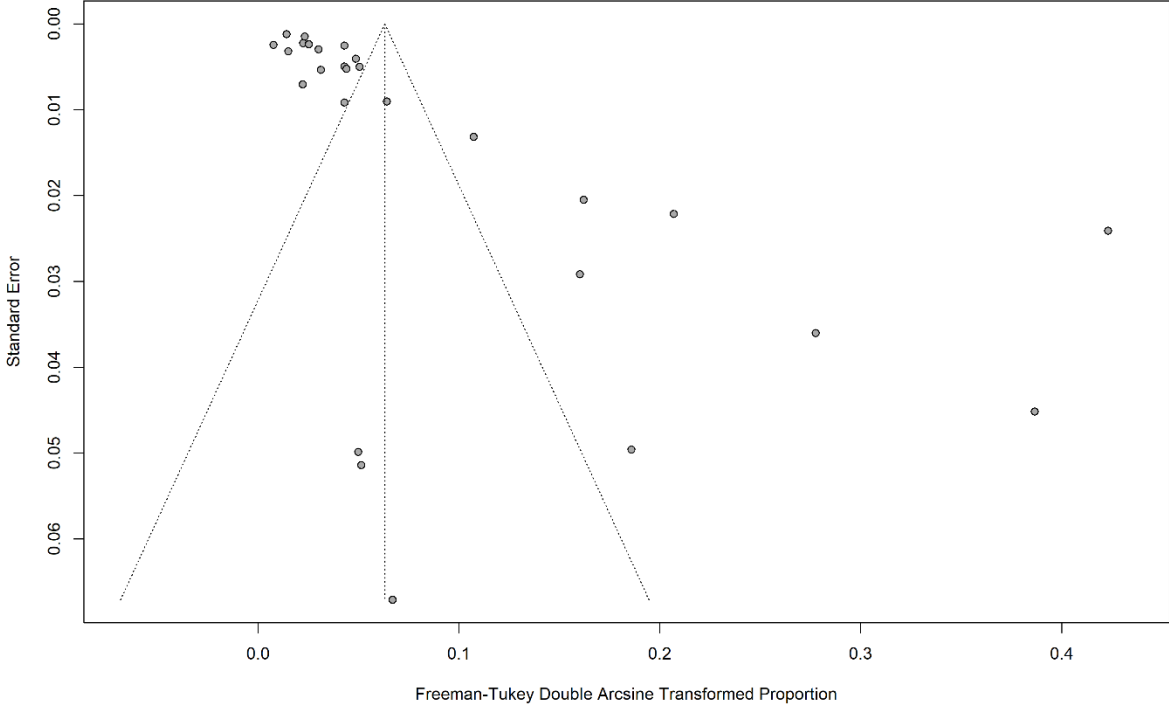

P Egger = < 0.001
