# Supplementary material for: Global epidemiology of occult hepatitis B virus infections in blood donors, a systematic review and meta-analysis
Source: PubMed Central journal article supplement (PMC9394819; doi:10.1371/journal.pone.0272920), 2022-08-22
Supplement: pone.0272920.s014.pdf [file pone.0272920.s014.pdf]

Appendix S9. Subgroup analyses of global prevalence of occult hepatitis B virus in blood donors.

|                                     | Prevalence. %<br>(95%CI) | 95% Prediction<br>interval | N<br>Studies | N<br>Participants | H (95%CI)        | I <sup>2</sup> (95%CI) | P<br>heterogeneity | P difference<br>subtypes |
|-------------------------------------|--------------------------|----------------------------|--------------|-------------------|------------------|------------------------|--------------------|--------------------------|
| <b>Study Design</b>                 |                          |                            |              |                   |                  |                        |                    | 0.028                    |
| Case control                        | 4.1 [2.6-6.1]            | NA                         | 1            | 508               | NA               | NA                     | 1                  |                          |
| Cross-sectional                     | 2.1 [1.8-2.4]            | [0.5-4.6]                  | 86           | 7395817           | 9.6 [9.2-10]     | 98.9 [98.8-99]         | <0.001             |                          |
| <b>Sampling</b>                     |                          |                            |              |                   |                  |                        |                    | 0.003                    |
| Non probabilistic                   | 1.7 [1.4-2]              | [0.3-3.8]                  | 71           | 7386731           | 9.6 [9.2-10.1]   | 98.9 [98.8-99]         | <0.001             |                          |
| Probabilistic                       | 7.3 [3.2-12.8]           | [0-38.9]                   | 16           | 9594              | 8 [7.2-8.9]      | 98.5 [98.1-98.7]       | <0.001             |                          |
| <b>Sampling method</b>              |                          |                            |              |                   |                  |                        |                    | 0.013                    |
| Consecutive sampling                | 1.7 [1.5-2]              | [0.4-3.9]                  | 67           | 7334815           | 9.7 [9.3-10.1]   | 98.9 [98.8-99]         | <0.001             |                          |
| Convenience sampling                | 2 [0.6-4.2]              | [0-18.5]                   | 4            | 51916             | 9.4 [7.6-11.6]   | 98.9 [98.3-99.3]       | <0.001             |                          |
| Simple random sampling              | 7.3 [3.2-12.8]           | [0-38.9]                   | 16           | 9594              | 8 [7.2-8.9]      | 98.5 [98.1-98.7]       | <0.001             |                          |
| <b>Timing of samples collection</b> |                          |                            |              |                   |                  |                        |                    | 0.669                    |
| Prospectively                       | 2.4 [2.1-2.9]            | [0.4-5.7]                  | 67           | 6942313           | 9.6 [9.2-10]     | 98.9 [98.8-99]         | <0.001             |                          |
| Retrospectively                     | 2.4 [1.7-3.1]            | [0.4-5.6]                  | 20           | 454012            | 9.1 [8.4-9.9]    | 98.8 [98.6-99]         | <0.001             |                          |
| <b>Countries</b>                    |                          |                            |              |                   |                  |                        |                    | <0.001                   |
| Argentina                           | 1.3 [0-12.1]             | NA                         | 2            | 70187             | 5.4 [3.2-8.8]    | 96.5 [90.5-98.7]       | <0.001             |                          |
| Bangladesh                          | 35.8 [27.5-44.7]         | NA                         | 1            | 120               | NA               | NA                     | 1                  |                          |
| Brazil                              | 1.6 [0-4.7]              | [0-84.5]                   | 3            | 594               | 2.1 [1.2-3.8]    | 77.4 [26.6-93]         | 0.012              |                          |
| Cameroon                            | 1.1 [0.4-2.3]            | NA                         | 1            | 522               | NA               | NA                     | 1                  |                          |
| Canada                              | 1.1 [0.5-1.7]            | NA                         | 1            | 1140              | NA               | NA                     | 1                  |                          |
| China                               | 0.3 [0.1-0.4]            | [0-1]                      | 15           | 435313            | 6.3 [5.5-7.1]    | 97.5 [96.7-98]         | <0.001             |                          |
| Colombia                            | 2 [0.7-3.9]              | NA                         | 1            | 302               | NA               | NA                     | 1                  |                          |
| Egypt                               | 9.5 [2.8-19.5]           | [0-57.4]                   | 5            | 1155              | 4.5 [3.3-6]      | 95 [90.9-97.2]         | <0.001             |                          |
| India                               | 3.7 [2.5-5.1]            | [0.3-10.1]                 | 13           | 114105            | 9.2 [8.2-10.2]   | 98.8 [98.5-99]         | <0.001             |                          |
| Indonesia                           | 16.3 [12-21.2]           | NA                         | 2            | 256               | 1 NA             | 1.3 NA                 | 0.314              |                          |
| Iran                                | 7.2 [0.8-17.7]           | [0-58.9]                   | 10           | 6406              | 8 [7-9.2]        | 98.4 [98-98.8]         | <0.001             |                          |
| Italy                               | 5.6 [3.2-8.5]            | NA                         | 1            | 288               | NA               | NA                     | 1                  |                          |
| Japan                               | 14.7 [0-62.9]            | NA                         | 2            | 4792              | 7.4 [4.9-11.2]   | 98.2 [95.9-99.2]       | <0.001             |                          |
| Kenya                               | 2.4 [0.9-4.5]            | NA                         | 1            | 293               | NA               | NA                     | 1                  |                          |
| Laos                                | 10.9 [7.7-14.6]          | NA                         | 1            | 320               | NA               | NA                     | 1                  |                          |
| Malaysia                            | 25.1 [0-97]              | [0-100]                    | 3            | 1055              | 15.2 [12.7-18.3] | 99.6 [99.4-99.7]       | <0.001             |                          |
| Mexico                              | 6.5 [1.5-14.2]           | [0-57.4]                   | 4            | 780               | 3.4 [2.3-5.1]    | 91.4 [81.2-96.1]       | <0.001             |                          |

|                             | Prevalence. %<br>(95%CI) | 95% Prediction<br>interval | N<br>Studies | N<br>Participants | H (95%CI)        | I <sup>2</sup> (95%CI) | P<br>heterogeneity | P difference<br>subtypes |
|-----------------------------|--------------------------|----------------------------|--------------|-------------------|------------------|------------------------|--------------------|--------------------------|
| Mongolia                    | 0.2 [0.2-0.3]            | NA                         | 1            | 14948             | NA               | NA                     | 1                  |                          |
| Mozambique                  | 1.1 [0.6-1.7]            | NA                         | 1            | 1435              | NA               | NA                     | 1                  |                          |
| Nigeria                     | 7.7 [2.8-14.6]           | [0-51.5]                   | 4            | 1076              | 3.5 [2.4-5.2]    | 91.8 [82.2-96.2]       | <0.001             |                          |
| Pakistan                    | 1.2 [0-4.3]              | [0-88]                     | 3            | 441               | 2 [1.1-3.6]      | 74.4 [14.9-92.3]       | 0.02               |                          |
| Saudi Arabia                | 8.6 [5-12.9]             | NA                         | 1            | 198               | NA               | NA                     | 1                  |                          |
| South Korea                 | 0.1 [0-0.4]              | NA                         | 1            | 1676              | NA               | NA                     | 1                  |                          |
| Spain                       | 0 [0-0]                  | NA                         | 1            | 245673            | NA               | NA                     | 1                  |                          |
| Sudan                       | 21.4 [15.1-28.5]         | NA                         | 1            | 145               | NA               | NA                     | 1                  |                          |
| Syria                       | 10.7 [3.9-19.8]          | NA                         | 2            | 94                | 1.2 NA           | 29.6 NA                | 0.233              |                          |
| Turkey                      | 0 [0-2]                  | NA                         | 1            | 86                | NA               | NA                     | 1                  |                          |
| United States of America    | 0.4 [0-1.8]              | [0-68.2]                   | 3            | 6492633           | 27.4 [24.2-30.9] | 99.9 [99.8-99.9]       | <0.001             |                          |
| Venezuela                   | 2.2 [0-7.4]              | NA                         | 2            | 292               | 1.4 NA           | 49.3 NA                | 0.16               |                          |
| <b>WHO Region</b>           |                          |                            |              |                   |                  |                        |                    | <0.001                   |
| Africa                      | 4.4 [1.3-9]              | [0-27.2]                   | 7            | 3326              | 5.1 [4.1-6.3]    | 96.1 [93.9-97.5]       | <0.001             |                          |
| America                     | 1.7 [1.1-2.5]            | [0-5.5]                    | 16           | 6565928           | 11.4 [10.5-12.4] | 99.2 [99.1-99.4]       | <0.001             |                          |
| Eastern Mediterranean       | 7.4 [3.2-13]             | [0-44]                     | 22           | 8439              | 6.6 [6-7.3]      | 97.7 [97.2-98.1]       | <0.001             |                          |
| Europe                      | 0.8 [0-6.8]              | [0-100]                    | 3            | 246047            | 5.7 [4-8.1]      | 96.9 [93.7-98.5]       | <0.001             |                          |
| South-East Asia             | 5.8 [4.3-7.6]            | [0.9-14.3]                 | 16           | 114481            | 9.5 [8.6-10.4]   | 98.9 [98.7-99.1]       | <0.001             |                          |
| Western Pacific             | 0.8 [0.5-1.1]            | [0-2.6]                    | 23           | 458104            | 8.4 [7.7-9.1]    | 98.6 [98.3-98.8]       | <0.001             |                          |
| <b>UNSD Region</b>          |                          |                            |              |                   |                  |                        |                    | <0.001                   |
| Central Africa              | 1.1 [0.4-2.3]            | NA                         | 1            | 522               | NA               | NA                     | 1                  |                          |
| Central America             | 6.5 [1.5-14.2]           | [0-57.4]                   | 4            | 780               | 3.4 [2.3-5.1]    | 91.4 [81.2-96.1]       | <0.001             |                          |
| Eastern Africa              | 1.5 [0.5-3]              | NA                         | 2            | 1728              | 1.7 [1-3.5]      | 63.4 [0-91.6]          | 0.098              |                          |
| Eastern Asia                | 0.4 [0.2-0.6]            | [0-1.5]                    | 19           | 456729            | 7.2 [6.5-8]      | 98.1 [97.6-98.4]       | <0.001             |                          |
| Northern Africa             | 11.3 [4.2-21.2]          | [0-54.5]                   | 6            | 1300              | 4.6 [3.5-5.9]    | 95.2 [91.9-97.1]       | <0.001             |                          |
| Northern America            | 0.5 [0-1.8]              | [0-13.2]                   | 4            | 6493773           | 22.7 [20.2-25.4] | 99.8 [99.8-99.8]       | <0.001             |                          |
| South America               | 1.5 [0-4.6]              | [0-18]                     | 8            | 71375             | 4.6 [3.7-5.7]    | 95.2 [92.6-96.9]       | <0.001             |                          |
| Southeastern Asia           | 19.2 [1.8-47.9]          | [0-100]                    | 6            | 1631              | 10.8 [9.3-12.6]  | 99.1 [98.8-99.4]       | <0.001             |                          |
| Southern Asia               | 4.7 [3.4-6.2]            | [0.2-13.4]                 | 27           | 121072            | 8.4 [7.8-9.1]    | 98.6 [98.4-98.8]       | <0.001             |                          |
| Southern Europe             | 1.4 [0-11.8]             | NA                         | 2            | 245961            | 8 [5.4-11.8]     | 98.4 [96.5-99.3]       | <0.001             |                          |
| West Africa                 | 7.7 [2.8-14.6]           | [0-51.5]                   | 4            | 1076              | 3.5 [2.4-5.2]    | 91.8 [82.2-96.2]       | <0.001             |                          |
| Western Asia                | 6 [0.7-14.9]             | [0-62.4]                   | 4            | 378               | 2.6 [1.6-4.1]    | 84.9 [62.5-93.9]       | <0.001             |                          |
| <b>Country income level</b> |                          |                            |              |                   |                  |                        |                    | <0.001                   |
| High-income economies       | 0.9 [0.5-1.5]            | [0-3]                      | 10           | 6746400           | 15.4 [14.1-16.8] | 99.6 [99.5-99.6]       | <0.001             |                          |

|                                                  | Prevalence. %<br>(95%CI) | 95% Prediction<br>interval | N<br>Studies | N<br>Participants | H (95%CI)        | I <sup>2</sup> (95%CI) | P<br>heterogeneity | P difference<br>subtypes |
|--------------------------------------------------|--------------------------|----------------------------|--------------|-------------------|------------------|------------------------|--------------------|--------------------------|
| Low-income economies                             | 9.6 [0.4-27.2]           | [0-98.1]                   | 4            | 1674              | 5.5 [4.1-7.4]    | 96.7 [94-98.2]         | <0.001             |                          |
| Lower-middle income economies                    | 5 [3.8-6.3]              | [0.4-13.4]                 | 30           | 132980            | 8.5 [7.9-9.1]    | 98.6 [98.4-98.8]       | <0.001             |                          |
| Upper-middle-income economies                    | 1.6 [1.3-2.1]            | [0.1-4.3]                  | 43           | 515271            | 7.4 [6.9-7.9]    | 98.2 [97.9-98.4]       | <0.001             |                          |
| <b>Population categories</b>                     |                          |                            |              |                   |                  |                        |                    | <0.001                   |
| HBsAg Negative                                   | 0.3 [0.2-0.4]            | [0-1]                      | 27           | 567324            | 5.8 [5.2-6.4]    | 97 [96.3-97.5]         | <0.001             |                          |
| HBsAg Negative & Anti-HBc<br>Negative            | 0 [0-0]                  | [0-0.2]                    | 7            | 72555             | 1.4 [1-2.1]      | 46.7 [0-77.5]          | 0.081              |                          |
| HBsAg Negative & Anti-HBc Positive               | 6.6 [5.7-7.5]            | [2.2-12.8]                 | 53           | 6756446           | 10.9 [10.5-11.5] | 99.2 [99.1-99.2]       | <0.001             |                          |
| <b>OBI diagnostic method</b>                     |                          |                            |              |                   |                  |                        |                    | <0.001                   |
| Classical PCR                                    | 1.7 [1.2-2.2]            | [0.2-4.4]                  | 27           | 477140            | 8 [7.4-8.7]      | 98.5 [98.2-98.7]       | <0.001             |                          |
| Loop mediated isothermal<br>amplification (LAMP) | 35.8 [27.5-44.7]         | NA                         | 1            | 120               | NA               | NA                     | 1                  |                          |
| Real-time PCR                                    | 2.6 [2.2-3.1]            | [0.5-5.9]                  | 59           | 6919065           | 9.9 [9.4-10.4]   | 99 [98.9-99.1]         | <0.001             |                          |
